# Diapause is not selected as a bet-hedging strategy in insects: a meta-analysis of reaction norm shapes.

Jens Joschinski<sup>1\*</sup>†, Dries Bonte<sup>1‡</sup>

<sup>1</sup> Terrestrial Ecology Unit (TEREC), Department of Biology, Ghent University, Ghent, Belgium.

\* [jens.joschinski@ugent.be](mailto:jens.joschinski@ugent.be)

† Twitter: @jensjoschi, ORCID: 0000-0001-7828-3336

‡ Twitter: @bontedries, ORCID: 0000-0002-3320-7505

Keywords: Phenotypic plasticity, diversified bet-hedging, conservative bet-hedging, insects, phenotypic variance, critical day length, photoperiodism, phenology, climate change

## 1 **Abstract**

2 Many organisms escape from lethal climatological conditions by entering a resistant resting  
3 stage called diapause, and it is essential that this strategy remains optimally timed with seasonal  
4 change. Climate change therefore exerts selection pressure on traits that regulate phenology,  
5 which is expected to cause the evolution of mean diapause timing, but also phenotypic  
6 plasticity and bet-hedging strategies. Especially the latter as a strategy to cope with  
7 unpredictability is so far little considered in the context of climate change, and it is unknown  
8 whether it can readily evolve.

9 Contemporary patterns of phenological strategies across a geographic range may provide  
10 information about their future evolvability. We thus extracted 447 diapause reaction norms  
11 from 57 studies. First, we correlated mean diapause timing with mean winter onset. Then we  
12 partitioned the reaction norm variance into a temporal component (phenotypic plasticity) and  
13 among-offspring variance (diversified bet-hedging) and correlated this variance composition  
14 with predictability of winter onset. Contrary to our expectation, mean diapause timing  
15 correlated only weakly with mean winter onset, as populations at high latitudes failed to track  
16 early onsets. Variance among offspring was also limited and correlated only weakly with  
17 environmental predictability, indicating little scope for bet-hedging. We conclude that  
18 evolutionary constraints limit the evolvability of phenological traits in a rapidly changing  
19 climate.

## 20 **Introduction**

21 Anthropogenic greenhouse gas emissions change the environment at an unprecedented rate  
22 (IPCC, 2014), and the majority of species faces extinction risks from climate change (Urban,  
23 2015). One of the most commonly observed responses to climate change is a shift in phenology,  
24 i.e. in the seasonal timing of an organism (Parmesan & Yohe, 2003). Changes in tree leaf-out  
25 (Badeck et al., 2004) and bird egg-laying dates (Dunn & Winkler, 1999) in spring are among  
26 the most famous examples of phenology shifts, but shifts in timing have been documented  
27 across nearly the whole tree of life (e.g. cyanobacteria, Zhang et al., 2012; fungi, Kauserud et  
28 al., 2008; cnidarians, Van Walraven et al., 2015; insects, Bell et al., 2015). Phenological shifts  
29 that match an organism's life cycle with novel conditions clearly provide fitness benefits  
30 (Visser & Gienapp, 2019). Nevertheless, there is increasing doubt that they will remain  
31 sufficient in a rapidly changing climate (Visser, 2008), so it is essential to infer the evolutionary  
32 potential of phenological strategies.

33 Phenology is a complex compound of traits that is subject to multiple selection pressures,  
34 predictions on the evolvability of phenological traits are therefore not straightforward. For  
35 example, variation in the extent of phenology shifts among interacting species may create  
36 phenological mismatches (Thackeray et al., 2016; Visser & Gienapp, 2019), thus selecting for  
37 covarying phenologies. Moreover, novel correlations of temperature and day length may  
38 impose physiological constraints, such as day length limitations for diurnal animals (Dunbar &  
39 Shi, 2013; Joschinski, Kiess & Krauss, 2019) and plants (Saikkonen et al., 2012; but see Zohner  
40 et al., 2016) – relying on developmental cues may then constitute an evolutionary trap (van  
41 Dyck et al., 2015; Snell-Rood et al., 2018). The genetic architecture that underlies phenological  
42 traits is elaborate (Robinet & Roques, 2010; Brachi et al., 2010), making such constraints by  
43 pleiotropic effects likely. Therefore it is not clear whether a complex trait such as phenology  
44 can evolve an optimal response to changing local conditions. A longitudinal analysis across

45 species and habitats may, however, provide information about the evolvability of phenological  
46 traits.

47 Rises in mean temperature are not the only potential cause of climate-change induced  
48 biodiversity loss - increasing climate variability imposes further extinction risk (Bathiany et  
49 al., 2018). Therefore, the concerted evolution of mean phenology and risk-reduction strategies  
50 will be required. There are four general strategies by which organisms can cope with changing  
51 environments (Seger & Brockmann, 1987; Starrfelt & Kokko, 2012; Tufto, 2015): Evolution  
52 of the mean timing, phenotypic plasticity, and bet-hedging (avoidance of fitness variance). The  
53 latter consists of strategies to avoid risk (conservative bet-hedging) and of strategies to spread  
54 the risk among one's offspring (diversified bet-hedging). These strategies are intricately related  
55 (Lande, 2009; Starrfelt & Kokko, 2012; Simons, 2014; Snell-Rood et al., 2018), examining  
56 their evolvability simultaneously is hence a daunting task. However, for binary traits with only  
57 two outcomes, such as the decision to overwinter or to germinate, the strategies can be  
58 conveniently separated by studying mean and variance composition of reaction norms (Fig.  
59 1A), as the strategies then form the extremes of a three-dimensional continuum (Joschinski &  
60 Bonte, 2019): the allocation of variance within vs among environments represents a continuum  
61 of diversified bet-hedging and phenotypic plasticity (Fig. 1B, x-axis), their sum fixed vs.  
62 flexible development (y-axis), and the mean the trade-off between arithmetic mean  
63 optimization and conservative bet-hedging (Fig. 1C). The adaptive value of the strategies is  
64 dictated by the environment, which may vary in its mean condition (e.g. mean timing of winter  
65 onset), its predictability, and the amplitude of change (i.e. seasonality); thus, one can infer the  
66 evolvability of evolutionary strategies by correlating the reaction norm properties with  
67 environmental conditions.

68

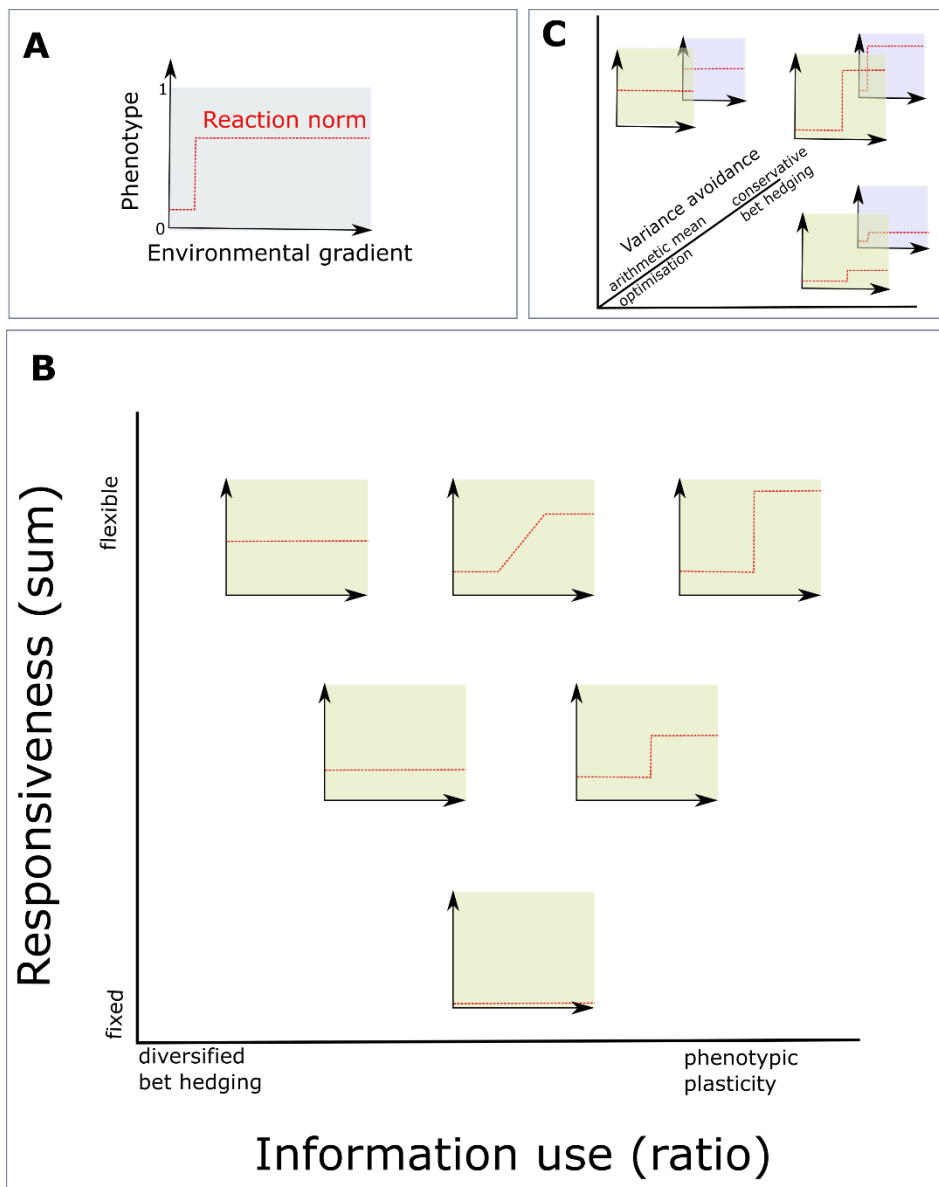

69

70 **Fig. 1. Relationship of evolutionary strategies with reaction norm properties.** Panel A shows a  
 71 dichotomous reaction norm. The decision to switch phenotypes can be expressed by a steep logistic  
 72 curve. Reaction norms can divert in various ways from this step function: By changes in the ratio (x-  
 73 axis) and sum (y-axis) of the variance components  $\sigma_{among}^2$  and  $\sigma_{within}^2$  (Panel B), and by changes in the  
 74 mean (Panel C). Axes describe the resulting evolutionary strategies.

75  $\sigma_{among}^2$  = squared standard deviation along environments ( $E_i$ ),  $\frac{\sum(pE_i - \bar{pE})^2}{n}$  ;  $\sigma_{within}^2$  = Variance

76 of Bernoulli draws,  $\frac{\sum pE_i(1-pE_i)}{n}$ ;  $r$  = variance composition,  $\frac{\sigma_{among}^2}{\sigma_{among}^2 + \sigma_{within}^2}$  ;  $s$  = phenotypic variance,

77  $\sigma_{among}^2 + \sigma_{within}^2$ .

78 Insect diapause, a resting stage to overwinter, is a dichotomous trait that has historically  
79 received much attention (e.g. Danilevskii, 1965; Bradshaw, 1976; Urbanski et al., 2012), and  
80 there is ample high-quality data under laboratory conditions available. Moreover, insect  
81 diapause is amongst the few well-studied traits that mediate autumn phenology, which is  
82 generally understudied (Gallinat, Primack & Wagner, 2015). We collected 447 of these reaction  
83 norms from laboratory experiments (57 studies; Supp. S1, Fig. 2), derived their mean,  
84 phenotypic variance and the variance composition, and then correlated them with winter onset  
85 and winter predictability as derived from climate data (Fig. 2).

86 Because studies are (understandably) biased to temperate climates, nearly no canalized  
87 phenotypes were available. We therefore concentrated on the other two axes and predicted that:

88 1) Inflection points of the logistic reaction norms (i.e., mean diapause) correlate with mean  
89 winter onset (*arithmetic mean optimization*)

90 2) The variance composition correlates with environmental predictability (*phenotypic*  
91 *plasticity / diversified bet-hedging*)

92 3) Deviation from model 1) correlates with environmental predictability (*conservative*  
93 *bet-hedging*)

94 Finally, we also estimated by how much diapause timing and critical photoperiod change with  
95 latitude, thereby validating earlier case studies based on less robust data (Danilevskii, 1965).

## 96 **Results and discussion**

### 97 *Adaptation of mean timing*

98 We restricted our search to studies of reaction norms with at least four day length treatments  
99 (mean 6.8) and from at least three populations. This decision naturally limited the number of  
100 available studies and resulted in geographical clustering (Fig. 2), and a scarcity of studies at  
101 latitudes above 55°N (limited mostly to *Drosophila*). Nevertheless the amount of data allowed  
102 correlating the inflection points with latitude, showing a linear increase by  $48.45 \pm 2.01$  min  
103 per 5 ° N (Fig. 3A;  $R^2_{total} = 0.55$ ,  $R^2_{order} = 0$ ,  $R^2_{species} = 0.66$ ,  $R^2_{population} = 0.59$ ; LRT ratio =  
104 364.1,  $p < 0.0001$ ). Earlier findings by Danilevskii reported slopes of 60 – 90 minutes / 5°N  
105 (Danilevskii, 1965), and this rule-of-thumb remains persistent in the literature (e.g. Riihimaa  
106 et al., 1996; Tyukmaeva et al., 2011; Hou et al., 2016). The early empirical observations were  
107 based on few case studies with data of relatively low resolution, while our meta-analysis  
108 integrates data from 57 high-quality studies and applies robust statistical approaches.  
109 Moreover, we were able to support the considerably lower estimate with climate data: the  
110 timing of winter onset (by which we mean gradually cooling autumn temperatures) was  
111 consistently earlier at higher latitudes and altitudes (Fig. 2A), and early autumn day length  
112 increases with latitude. Taken together, we predicted that day length at winter onset declines  
113 by 46.34 minutes per 5° latitude between 21 and 69 °N ( $R^2 = 0.54$  ; Supp. S2), and this  
114 prediction was in close agreement with the critical day length shift of 48 min/5°N that we found  
115 in our dataset. Thus, we do not only provide strong empirical evidence for Danilevskii's  
116 observation, but also provide a more reliable estimate and support it with climate data.

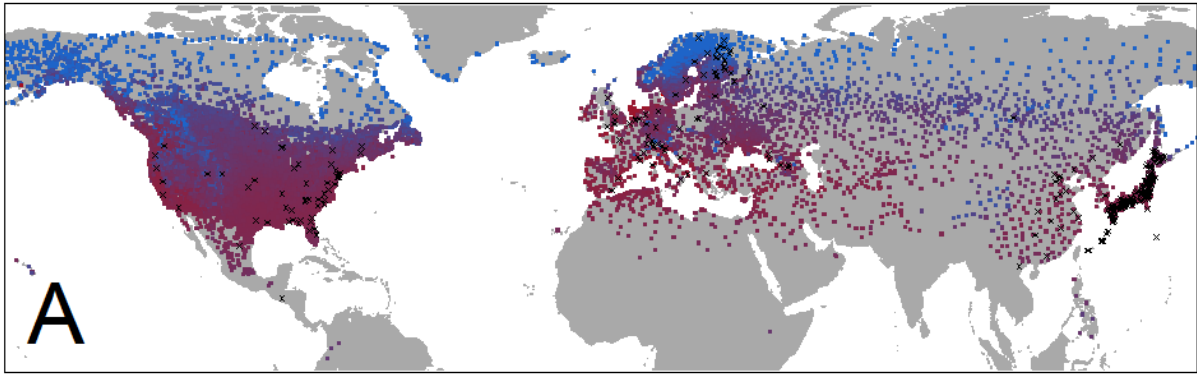

117

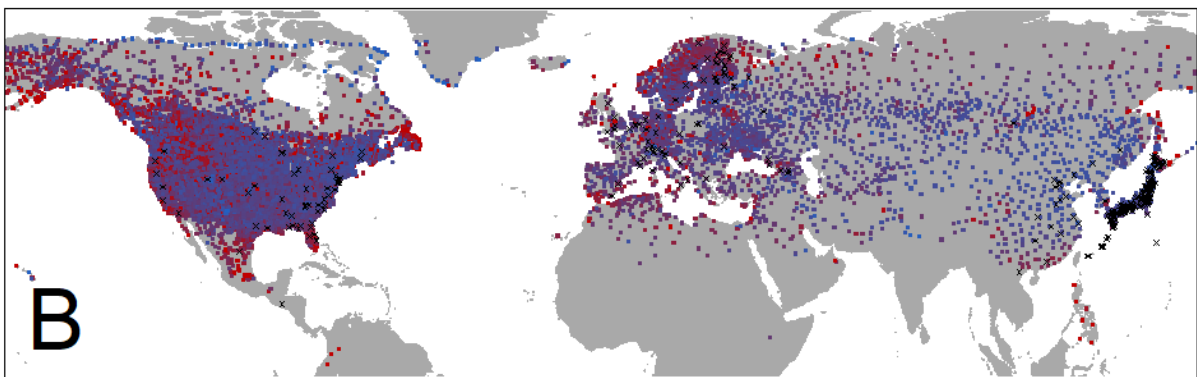

118

119 **Fig. 2.: Winter onset calculation based on GHCN-daily climate data. A: Mean winter onset, B:**  
120 **Standard deviation in winter onset (day length predictability). Standard deviations above 30 received**  
121 **same color as standard deviations of 30. Black crosses: sampling locations of empirical studies.**

122



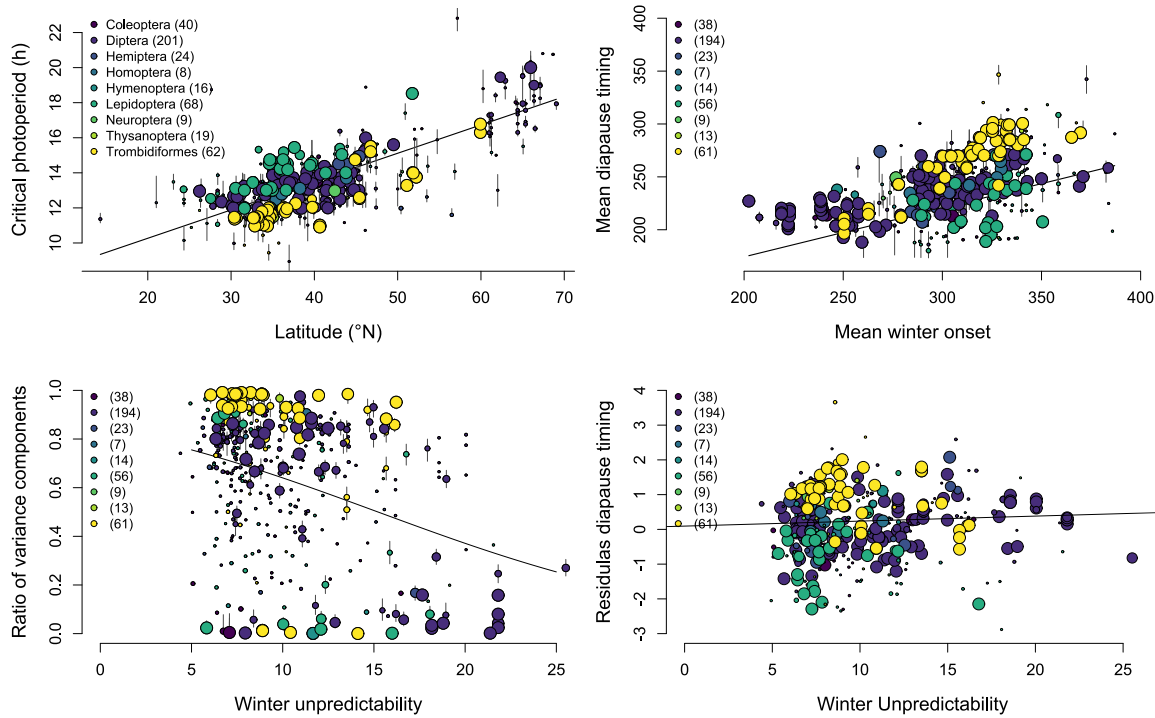

123

124 **Fig. 3. Correlation of reaction norm properties with climate variables.** **A:** Critical photoperiod  
125 from primary studies versus latitude; **B:** Correlation of mean diapause timing with mean winter onset;  
126 **C:** Variance composition versus day length predictability. Ratios of 0 indicate the potential for pure  
127 bet-hedging strategies, ratios of 1 equal purely plastic strategies; **D:** Residual deviation from diapause  
128 timing against winter predictability (conservative bet-hedging). Each data point represents 1 reaction  
129 norm (447 in total), size of the points scales with credibility (credible interval range for reliable points  
130 in dark grey). The legend indicates the number of reaction norms per order.

131 Day length is not a selective agent and has rarely direct implications for fitness (Joschinski,  
132 Hovestadt & Krauss, 2015; but see Dunbar & Shi, 2013; Joschinski, Kiess & Krauss, 2019) –  
133 rather the correlated temperature drop imposes selection. We thus converted the inflection  
134 points to julian days. This measure correlated only weakly with latitude (Fig. S3;  $R^2_{total} = 0.11$ ,  
135  $R^2_{order} = 0$ ,  $R^2_{species} = 0$ ,  $R^2_{population} = 0.35$ ; LRT ratio = 136.6,  $p < 0.0001$ ) and mean winter  
136 onset (Fig. 3B;  $R^2_{total} = 0.20$ ,  $R^2_{order} = 0$ ,  $R^2_{species} = 0.15$ ,  $R^2_{population} = 0.41$ ; LRT ratio =  
137 168.0,  $p < 0.0001$ ), and the low correlation was caused by two factors. Firstly, variance was  
138 elevated at low latitudes with late winter onsets. Day length changes less over the year at low  
139 latitudes, so random deviation from the optimal day length response (or measurement error)  
140 caused large variation in diapause timing. Secondly, the statistically more influential northern  
141 *Drosophila* species (early winter onset) deviated from the strong negative linear trend, causing  
142 an overall decline in  $R^2$  values and slope. Bias to a single genus complicates the interpretation,  
143 but it is conceivable that the evolution of photoperiodic reaction norms is constrained at high  
144 latitude, particularly as the required day length increases exponentially with latitude (Supp.  
145 S2). Whether the failure to adapt to very long day lengths at high latitudes increases extinction  
146 risks remains to be determined, as high-latitude populations may invest more resources in cold  
147 hardening (Kimura, 2004). Species- or population- specific winter onset definitions were  
148 unfortunately not available, and further assumptions on differences in cold tolerance would  
149 inflate the researchers degrees of freedom (Simmons, Nelson & Simonsohn, 2011) to an  
150 unfeasible level. Nevertheless, our results were robust to changes in the mean winter onset  
151 thresholds (Supp S4), indicating a broad-scale applicability of our findings. More research is  
152 needed to determine the vulnerability of northern populations to climate change, but we  
153 demonstrate that interpretations based on photoperiodic reaction norms alone do not draw an  
154 adequate picture.

155 *Bet-hedging and plasticity*

156 So far, bet-hedging strategies have rarely been studied in the context of climate change,  
157 potentially limited by the difficulties of quantifying variance and attributing it to an adaptive  
158 strategy rather than random noise. Our approach of decomposing reaction norm variance  
159 among vs. within environments offered a novel view on the joint evolution of plasticity and  
160 bet-hedging, but also required measurements over multiple environments. Although it has been  
161 shown that higher-order moments of the reaction norm diverge stronger among populations  
162 and species than offset and slope, and thus may have a larger impact on evolution (Murren et  
163 al., 2014), such analyses on higher moments are still rare.

164 Our analysis revealed that day length reaction norms are more variable than is commonly  
165 acknowledged. The reaction norm shapes ranged from very steep to entirely flat (Fig. 3C),  
166 though steep reaction norms were more common than flat ones. The existence of reaction norm  
167 shapes with high variance within environments does not necessarily constitute bet-hedging,  
168 however. Ultimately it needs to be demonstrated that phenotypic variance increases geometric  
169 mean fitness in a population's respective environment (Simons, 2011). We took a comparative  
170 approach and correlated variance within environments with winter predictability, i.e. tested  
171 whether reaction norms are fine-tuned by local selection. This correlation was, however, very  
172 weak (Fig. 3C;  $R^2_{total} = 0.11$ ,  $R^2_{order} = 0$ ,  $R^2_{species} = 0.31$ ,  $R^2_{population} = 0.08$ ; LRT ratio =  
173 33.18,  $p < 0.0001$ ). Given the large scope of the meta-analysis, we conclude that diversified  
174 bet-hedging in diapause is rare.

175 We can only speculate about the reasons for an apparent lack of bet-hedging. One potential  
176 reason is the multifactorial nature of phenological traits (Reznik et al., 2015). Diapause may,  
177 for example, occur in multiple life history stages (Kurota & Shimada, 2003a,b), vary in  
178 intensity (Wang et al., 2012), or vary in the number of successive short days that are required

179 to induce a response (Beach, 1978). Each of those phenological traits harbors its own potential  
180 for adaptive plasticity or bet-hedging, making bet-hedging in the onset of diapause potentially  
181 redundant. Alternatively, the observed strongly plastic responses might truly be non-adaptive,  
182 either because reaction norms with high variance within environments are unlikely to evolve,  
183 or because the time since introduction to a novel environment, and hence the time needed to  
184 adapt (often only 2-3 decades, e.g. (Urbanski et al., 2012; Reznik et al., 2015)), has been too  
185 short.

186 As alternative to diversified bet-hedging, unpredictable conditions may select for early  
187 diapause, so that the risk of fitness loss by early frost is mitigated at the cost of population  
188 growth (conservative bet-hedging, Seger & Brockmann, 1987; Starrfelt & Kokko, 2012).  
189 Hence we expected residual variation in mean phenology to correlate with environmental  
190 predictability, such that populations in highly unpredictable environments diapause earlier than  
191 expected based on mean winter onset. We did not find any evidence for conservative bet-  
192 hedging either (Fig. 3D;  $R^2 = 0$ ; LRT ratio = 0.23,  $p = 0.63$ ). Empirical evidence for  
193 conservative bet-hedging is rare (Simons, 2011), and indeed not expected for many life history  
194 strategies (Poethke, Hovestadt & Mitesser, 2016), which may explain the lack of conservative  
195 bet-hedging in our study.

#### 196 *Evolutionary potential in a changing climate*

197 Shifts in phenology play a key role in adapting to climate change (Badeck et al., 2004;  
198 Thackeray et al., 2016; Visser & Gienapp, 2019), but there are concerns that constraints limit  
199 the evolutionary potential of phenology shifts. We have shown that the mean diapause timing  
200 of northern populations did not match environmental conditions, potentially due to the extreme  
201 shifts of the day length reaction norms that would be required at high latitudes. This  
202 discrepancy will likely continue to increase as species shift their range northwards, increasing

203 the extinction risk at the already vulnerable (Nilsson-Örtman & Johansson, 2017) northern edge  
204 of species distributions. There is additional concern that species- or guild-specific phenological  
205 strategies cause a phenological mismatch among interacting species (Visser & Gienapp, 2019);  
206 however, because the constraints in the evolvability of day length reaction norms have a clear  
207 physical basis (exponential increase of day length at winter onset with latitude), we find it likely  
208 that phenologies converge with increasing latitude. Thus, we currently see little scope for  
209 increasing phenological mismatches. Nevertheless, biotic factors may further amplify the  
210 extinction risk imposed by changes in means and constraints in reaction norms.

211 Genetic adaptation of the mean is not the only viable strategy in a changing climate; rather the  
212 relative contribution of phenotypic plasticity (Visser, 2008), as well as its relation with  
213 adaptation are critical for population persistence (Kelly, 2019). On the one hand, observed  
214 phenology shifts may partly rely on pre-existing (and limited) phenotypic plasticity (Lane et  
215 al., 2018), making long-term population persistence under continued change less likely; on the  
216 other hand, phenotypic plasticity (and, so far neglected, bet-hedging strategies) may evolve,  
217 which may speed up genetic adaptation while delaying extinction (Lande, 2009; Snell-Rood et  
218 al., 2018). Thus, to estimate the potential for future phenology shifts, it is essential to  
219 disentangle the various evolutionary strategies to cope with change. By partitioning the  
220 variance of reaction norms among vs. within environments, we separated plasticity and  
221 diversified bet-hedging, allowing for an integrated view on evolutionary strategies.

222 We have shown that plastic reactions by developmental switches are common. In the majority  
223 of cases, the reaction norms were very steep and thus lead to rapid change of phenotypes within  
224 a short time window. Such steep developmental reaction norms might lead to an evolutionary  
225 trap, unless they are accompanied by plasticity to other cues (van Dyck et al., 2015) or  
226 generalized phenotypic responses such as adaptations to cope with stress (Snell-Rood et al.,

227 2018). It appears that the evolution of flat (but not canalized) reaction norms is indeed  
228 constrained, leaving species vulnerable to changes in climate variability.

## 229 **Conclusions**

230 Our analysis demonstrates that diapause reaction norms are frequently not optimally adapted  
231 to local environments. The lack of adaptation at high latitudes and in unpredictable  
232 environments points to potential evolutionary constraints, which may hinder phenological  
233 adaptation in a changing climate. These constraints may be partially alleviated by the  
234 integration of alternative cues, such as the modulation of photoperiodic responses by  
235 temperature (e.g. Beach, 1978; Ichijo, 1986; Chen et al., 2013), but the evolution of integrated  
236 cues remains to be tested in future studies.

237

## 238 **Methods**

239 A full description of the methods can be found in supplementary material S5, and a list of all  
240 search terms can be found in supplementary material S6. In short, we extracted photoperiodic  
241 response curves from 57 published studies (447 diapause reaction norms) along with their  
242 sampling locations. In these studies three or more populations of a species have been subjected  
243 to several (4 or more) day length conditions in climate chambers, and the percentage of  
244 diapausing individuals under each day length was reported. To reconstruct continuous reaction  
245 norms from this discontinuous data, we applied a Markov chain Monte Carlo algorithm to  
246 estimate lower and upper limit, inflection point and slope of the logit-shaped reaction norms.  
247 Based on these parameters we calculated mean diapause timing, degree of phenotypic variance  
248 and variance composition according to the following formulas:

$$249 \sigma_{within}^2 \stackrel{\text{def}}{=} \frac{\sum p_x*(1-p_x)}{n}$$

250  $\sigma_{among}^2 \stackrel{\text{def}}{=} \frac{\sum (p_x - \bar{p}_x)^2}{n-1}$

251  $r = \frac{\sigma_{among}^2}{\sigma_{among}^2 + \sigma_{within}^2}$

252  $\sigma_p^2 = \sigma_{among}^2 + \sigma_{within}^2$

253 In these expressions  $n$  represents the number of day length treatments, and  $p_x$  the percentage  
254 of diapausing individuals under day length  $x$ .

255 We used climate station data from the GHCN-D database (Menne et al., 2012a,b) to calculate  
256 mean winter onset for 25,340 locations. Winter predictability was then defined as the among-  
257 year standard deviation in winter onset. After merging climate data and empirical data, we  
258 correlated reaction norm properties with these climate variable, using linear mixed-effects  
259 models with a nested random structure (Viechtbauer, 2010) of populations/species/order. We  
260 performed the following models:

261

262 0a) The inflection point of the reaction norm (critical day length) was correlated with latitude

263 0b) Mean diapause timing (a conversion of critical day length to julian days) was correlated  
264 with latitude

265 1) Mean diapause timing was correlated with mean winter onset

266 2) variance composition (e.q. 4) was correlated with winter predictability

267 3) the residuals of model 1 were correlated with winter predictability.

268 We assumed a gaussian distribution for all models, though we logit-transformed variance  
269 ratios prior to analysis. Model 3 was conducted without the nested random terms, because  
270 their effect was already accounted for by model 1.

271

## 272 **Acknowledgments**

273 This research has benefitted from a statistical consult with Ghent University FIRE (Fostering  
274 Innovative Research based on Evidence). We thank the Bradshaw & Holzapfel group  
275 (University of Oregon) and Masahito T. Kimura (Hokkaido University Museum) for going to  
276 great lengths to share their data. In addition we would like to thank Jan Baert and Thomas  
277 Hovestadt for discussion of this manuscript. JJ was financially supported by a DFG research  
278 fellowship. DB is funded by FWO project G018017N.

279

## 280 **References**

- 281 Bache SM, Wickham H. 2014. *magrittr: A Forward-Pipe Operator for R*. R package version  
282 1.5.
- 283 Badeck FW, Bondeau A, Bottcher K, Doktor D, Lucht W, Schaber J, Sitch S. 2004.  
284 Responses of spring phenology to climate change. *New Phytologist* 162:295–309.  
285 DOI: 10.1111/j.1469-8137.2004.01059.x.
- 286 Bathiany S, Dakos V, Scheffer M, Lenton TM. 2018. Climate models predict increasing  
287 temperature variability in poor countries. *Science Advances* 4:eaar5809. DOI:  
288 10.1126/sciadv.aar5809.
- 289 Beach R. 1978. The required day number and timely induction of diapause in geographic  
290 strains of the mosquito *Aedes atropalpus*. *Journal of Insect Physiology* 24:449–455.  
291 DOI: 10.1016/0022-1910(78)90088-4.
- 292 Becker RA, Wilks AR, Brownrigg R, Minka TP, Deckmyn A. 2018. *maps: Draw*  
293 *Geographical Maps*. R package version 3.3.0.
- 294 Bell JR, Alderson L, Izera D, Kruger T, Parker S, Pickup J, Shortall CR, Taylor MS, Verrier  
295 P, Harrington R. 2015. Long-term phenological trends, species accumulation rates,



- 296 aphid traits and climate: five decades of change in migrating aphids. *Journal of*  
297 *Animal Ecology* 84:21–34. DOI: 10.1111/1365-2656.12282.
- 298 Brachi B, Faure N, Horton M, Flahauw E, Vazquez A, Nordborg M, Bergelson J, Cuguen J,  
299 Roux F. 2010. Linkage and association mapping of *Arabidopsis thaliana* flowering  
300 time in nature. *PLOS Genetics* 6:e1000940. DOI: 10.1371/journal.pgen.1000940.
- 301 Bradshaw WE. 1976. Geography of photoperiodic response in diapausing mosquito. *Nature*  
302 262:384–386. DOI: 10.1038/262384b0.
- 303 Bradshaw WE, Quebodeaux MC, Holzapfel CM. 2003. Circadian rhythmicity and  
304 photoperiodism in the pitcher-plant mosquito: adaptive response to the photic  
305 environment or correlated response to the seasonal environment? *The American*  
306 *Naturalist* 161:735–748. DOI: 10.1086/374344.
- 307 Chen Y-S, Chen C, He H-M, Xia Q-W, Xue F-S. 2013. Geographic variation in diapause  
308 induction and termination of the cotton bollworm, *Helicoverpa armigera* Hübner  
309 (Lepidoptera: Noctuidae). *Journal of Insect Physiology* 59:855–862. DOI:  
310 10.1016/j.jinsphys.2013.06.002.
- 311 Danilevskii AS. 1965. *Photoperiodism and seasonal development of insects*. Edinburgh:  
312 Oliver & Boyd.
- 313 Dowle M, Srinivasan A. 2017. *data.table: Extension of `data.frame`*. R package version  
314 1.11.4.
- 315 Dunbar RIM, Shi J. 2013. Time as a constraint on the distribution of feral goats at high  
316 latitudes. *Oikos* 122:403–410. DOI: 10.1111/j.1600-0706.2012.20596.x.
- 317 Duncan Temple Lang and the CRAN team. 2018. *RCurl: General Network (HTTP/FTP/...)*  
318 *Client Interface for R*. R package version 4.11.

- 319 Dunn P, Winkler D. 1999. Climate change has affected the breeding date of tree swallows  
320 throughout North America. *Proceedings of the Royal Society B: Biological Sciences*  
321 266:2487–2490. DOI: 10.1098/rspb.1999.0950.
- 322 van Dyck H, Bonte D, Puls R, Gotthard K, Maes D. 2015. The lost generation hypothesis:  
323 could climate change drive ectotherms into a developmental trap? *Oikos* 124:54–61.  
324 DOI: 10.1111/oik.02066.
- 325 Gallinat AS, Primack RB, Wagner DL. 2015. Autumn, the neglected season in climate  
326 change research. *Trends in Ecology & Evolution* 30:169–176. DOI:  
327 10.1016/j.tree.2015.01.004.
- 328 Garnier S. 2018. *viridis: default color maps from “matplotlib”*. R package version 0.5.1.
- 329 Gomi T, Adachi K, Shimizu A, Tanimoto K, Kawabata E, Takeda M. 2009. Northerly shift in  
330 voltinism watershed in *Hyphantria cunea* (Drury) (Lepidoptera: Arctiidae) along the  
331 Japan Sea coast: Evidence of global warming? *Applied Entomology and Zoology*  
332 44:357–362. DOI: 10.1303/aez.2009.357.
- 333 Gomi T, Takeda M. 1996. Changes in life-history traits in the fall webworm within half a  
334 century of introduction to Japan. *Functional Ecology* 10:384–389. DOI:  
335 10.2307/2390287.
- 336 Halkett F, Harrington R, Hullé M, Kindlmann P, Menu F, Rispe C, Plantegenest M. 2004.  
337 Dynamics of production of sexual forms in aphids: theoretical and experimental  
338 evidence for adaptive “coin-flipping” plasticity. *The American Naturalist* 163:E112–  
339 E125. DOI: 10.1086/383618.
- 340 Hijmans RJ. 2017. *geosphere: spherical trigonometry*. R package version 1.5-7.
- 341 Hou Y-Y, Xu L-Z, Wu Y, Wang P, Shi J-J, Zhai B-P. 2016. Geographic variation of diapause  
342 and sensitive stages of photoperiodic response in *Laodelphax striatellus* Fallén  
343 (Hemiptera: Delphacidae). *Journal of Insect Science* 16. DOI: 10.1093/jisesa/iev161.

- 344 Ichijo N. 1986. Disjunctive cline of critical photoperiod in the reproductive diapause of  
345 *Drosophila lacertosa*. *Evolution* 40:418–421. DOI: 10.2307/2408820.
- 346 IPCC. 2014. *Climate Change 2014: Synthesis report. Contribution of Working Groups I, II*  
347 *and III to the fifth assessment report of the Intergovernmental Panel on Climate*  
348 *Change*. Geneva, Switzerland.
- 349 Ito K, Nakata T. 2000. Geographical variation of photoperiodic response in the females of a  
350 predatory bug, *Orius sauteri* (Poppius) (Heteroptera: Anthocoridae) from northern  
351 Japan. *Applied Entomology and Zoology* 35:101–105. DOI: 10.1303/aez.2000.101.
- 352 Jordan RG, Bradshaw WE. 1978. Geographic Variation in the Photoperiodic Response of the  
353 Western Tree-Hole Mosquito, *Aedes sierrensis*. *Annals of the Entomological Society*  
354 *of America* 71:487–490. DOI: 10.1093/aesa/71.4.487.
- 355 Joschinski J, Bonte D. 2019. Trans-generational plasticity and bet-hedging: a common eco-  
356 evolutionary framework of utter relevance for climate change adaptation.  
357 *EcoEvoRxiv*. Available at [dx.doi.org/10.32942/osf.io/trg34](https://doi.org/10.32942/osf.io/trg34). (accessed April 6, 2019).
- 358 Joschinski J, Hovestadt T, Krauss J. 2015. Coping with shorter days: do phenology shifts  
359 constrain aphid fitness? *PeerJ* 3:e1103. DOI: 10.7717/peerj.1103.
- 360 Joschinski J, Kiess T, Krauss J. 2019. Day length constrains the time budget of aphid  
361 predators. *Insect Science* 26:164–170. DOI: 10.1111/1744-7917.12507.
- 362 Kato Y. 2005. Geographic variation in photoperiodic response for the induction of pupal  
363 diapause in the Aristolochia-feeding butterfly *Atrophaneura alcinous*. *Applied*  
364 *Entomology and Zoology* 40:347–350. DOI: 10.1303/aez.2005.347.
- 365 Kauserud H, Stige LC, Vik JO, Økland RH, Høiland K, Stenseth NC. 2008. Mushroom  
366 fruiting and climate change. *Proceedings of the National Academy of Sciences*  
367 105:3811–3814. DOI: 10.1073/pnas.0709037105.

- 368 Kelly M. 2019. Adaptation to climate change through genetic accommodation and  
369 assimilation of plastic phenotypes. *Philosophical Transactions of the Royal Society B:*  
370 *Biological Sciences* 374:20180176. DOI: 10.1098/rstb.2018.0176.
- 371 Kimura MT. 1984. Geographic variation of reproductive diapause in the *Drosophila auraria*  
372 complex (Diptera: Drosophilidae). *Physiological Entomology* 9:425–431. DOI:  
373 10.1111/j.1365-3032.1984.tb00784.x.
- 374 Kimura MT. 1988. Adaptations to temperate climates and evolution of overwintering  
375 strategies in the *Drosophila melanogaster* species group. *Evolution* 42:1288–1297.  
376 DOI: 10.2307/2409012.
- 377 Kimura MT. 2004. Cold and heat tolerance of drosophilid flies with reference to their  
378 latitudinal distributions. *Oecologia* 140:442–449. DOI: 10.1007/s00442-004-1605-4.
- 379 Kimura MT, Bessho A, Dai Z-H. 1993. The influence of gene flow on latitudinal clines of  
380 photoperiodic adult diapause in the *Drosophila auraria* species-complex. *Biological*  
381 *Journal of the Linnean Society* 48:335–341. DOI: 10.1016/0024-4066(93)90004-8.
- 382 Kimura MT, Ohtsu T, Yoshida T, Awasaki T, Lin F-J. 1994. Climatic adaptations and  
383 distributions in the *Drosophila takahashii* species subgroup (Diptera: Drosophilidae).  
384 *Journal of Natural History* 28:401–409. DOI: 10.1080/00222939400770181.
- 385 Koveos DS, Kroon A, Veerman A. 1993. The same photoperiodic clock may control  
386 induction and maintenance of diapause in the spider mite *Tetranychus urticae*. *Journal*  
387 *of Biological Rhythms* 8:265–282. DOI: 10.1177/074873049300800401.
- 388 Kurahashi H, Ohtaki T. 1989. Geographic variation in the incidence of pupal diapause in  
389 Asian and Oceanian species of the flesh fly *Boettcherisca* (Diptera: Sarcophagidae).  
390 *Physiological Entomology* 14:291–298. DOI: 10.1111/j.1365-3032.1989.tb01096.x.

- 391 Kurota H, Shimada M. 2003a. Photoperiod-dependent adult diapause within a geographical  
392 cline in the multivoltine bruchid *Bruchidius dorsalis*. *Entomologia Experimentalis et*  
393 *Applicata* 106:177–185. DOI: 10.1046/j.1570-7458.2003.00023.x.
- 394 Kurota H, Shimada M. 2003b. Geographical variation in photoperiodic induction of larval  
395 diapause in the bruchid beetle, *Bruchidius dorsalis*: polymorphism in overwintering  
396 stages. *Entomologia Experimentalis et Applicata* 107:11–18. DOI: 10.1046/j.1570-  
397 7458.2003.00033.x.
- 398 Lande R. 2009. Adaptation to an extraordinary environment by evolution of phenotypic  
399 plasticity and genetic assimilation. *Journal of Evolutionary Biology* 22:1435–1446.  
400 DOI: 10.1111/j.1420-9101.2009.01754.x.
- 401 Lane JE, McAdam AG, McFarlane SE, Williams CT, Humphries MM, Coltman DW, Gorrell  
402 JC, Boutin S. 2018. Phenological shifts in North American red squirrels:  
403 disentangling the roles of phenotypic plasticity and microevolution. *Journal of*  
404 *Evolutionary Biology* 31:810–821. DOI: 10.1111/jeb.13263.
- 405 Lankinen P. 1986. Geographical variation in circadian eclosion rhythm and photoperiodic  
406 adult diapause in *Drosophila littoralis*. *Journal of Comparative Physiology A* 159:123–  
407 142. DOI: 10.1007/BF00612503.
- 408 Lehmann P, Lyytinen A, Piironen S, Lindström L. 2015. Latitudinal differences in diapause  
409 related photoperiodic responses of European Colorado potato beetles (*Leptinotarsa*  
410 *decemlineata*). *Evolutionary Ecology* 29:269–282. DOI: 10.1007/s10682-015-9755-x.
- 411 Lumme J, Oikarinen A. 1977. The genetic basis of the geographically variable photoperiodic  
412 diapause in *Drosophila littoralis*. *Hereditas* 86:129–141. DOI: 10.1111/j.1601-  
413 5223.1977.tb01221.x.

- 414 Lushai G, Harrington R. 1996. Inheritance of photoperiodic response in the bird cherry aphid,  
415 *Rhopalosiphum padi*. *Physiological Entomology* 21:297–303. DOI: 10.1111/j.1365-  
416 3032.1996.tb00868.x.
- 417 Menne M, Durre I, Korzeniewski B, McNeal S, Thomas K, Yin X, Anthony S, Ray R, Vose  
418 RS, Gleason BE, Houston TG. 2012a. Global Historical Climatology Network - Daily  
419 (GHCN-Daily), Version 3. 22.
- 420 Menne MJ, Durre I, Vose RS, Gleason BE, Houston TG. 2012b. An Overview of the Global  
421 Historical Climatology Network-Daily Database. *Journal of Atmospheric and*  
422 *Oceanic Technology* 29:897–910. DOI: 10.1175/JTECH-D-11-00103.1.
- 423 Murata Y, Ideo S, Watada M, Mitsui H, Kimura MT. 2013. Genetic and physiological  
424 variation among sexual and parthenogenetic populations of *Asobara japonica*  
425 (Hymenoptera: Braconidae), a larval parasitoid of drosophilid flies. *European Journal*  
426 *of Entomology* 106:171–178. DOI: 10.14411/eje.2009.020.
- 427 Murren CJ, Maclean HJ, Diamond SE, Steiner UK, Heskell MA, Handelsman CA, Ghalambor  
428 CK, Auld JR, Callahan HS, Pfennig DW, Relyea RA, Schlichting CD, Kingsolver J.  
429 2014. Evolutionary change in continuous reaction norms. *The American Naturalist*  
430 183:453–467. DOI: 10.1086/675302.
- 431 Musolin DL, Tougou D, Fujisaki K. 2011. Photoperiodic response in the subtropical and  
432 warm-temperate zone populations of the southern green stink bug *Nezara viridula*:  
433 why does it not fit the common latitudinal trend? *Physiological Entomology* 36:379–  
434 384. DOI: 10.1111/j.1365-3032.2011.00797.x.
- 435 Nakao S. 2011. Geographical variation of photoperiodic wing form determination and genetic  
436 background of reproductive diapause in arrhenotokous populations of *Thrips*  
437 *nigropilosus* Uzel (Thysanoptera: Thripidae) in Japan. *Applied Entomology and*  
438 *Zoology* 46:111–116. DOI: 10.1007/s13355-010-0016-8.

- 439 Nechols JR, Tauber MJ, Tauber CA. 1987. Geographical variability in ecophysiological traits  
440 controlling dormancy in *Chrysopa oculata* (Neuroptera: Chrysopidae). *Journal of*  
441 *Insect Physiology* 33:627–633. DOI: 10.1016/0022-1910(87)90131-4.
- 442 Nilsson-Örtman V, Johansson F. 2017. The rate of seasonal changes in temperature alters  
443 acclimation of performance under climate change. *The American Naturalist* 190:743–  
444 761. DOI: 10.1086/694412.
- 445 Noda H. 1992. Geographic variation of nymphal diapause in the small brown planthopper in  
446 Japan. *Japan Agricultural Research Quarterly* 26:124–129.
- 447 Paolucci S, Zande L van de, Beukeboom LW. 2013. Adaptive latitudinal cline of  
448 photoperiodic diapause induction in the parasitoid *Nasonia vitripennis* in Europe.  
449 *Journal of Evolutionary Biology* 26:705–718. DOI: 10.1111/jeb.12113.
- 450 Parmesan C, Yohe G. 2003. A globally coherent fingerprint of climate change impacts across  
451 natural systems. *Nature* 421:37. DOI: 10.1038/nature01286.
- 452 Pegoraro M, Zonato V, Tyler ER, Fedele G, Kyriacou CP, Tauber E. 2017. Geographical  
453 analysis of diapause inducibility in European *Drosophila melanogaster* populations.  
454 *Journal of Insect Physiology* 98:238–244. DOI: 10.1016/j.jinsphys.2017.01.015.
- 455 Plummer M. 2018. *rjags: Bayesian Graphical Models using MCMC*. R package version 4-8.
- 456 Poethke HJ, Hovestadt T, Mitesser O. 2016. The evolution of optimal emergence times: bet  
457 hedging and the quest for an ideal free temporal distribution of individuals. *Oikos*  
458 125:1647–1656. DOI: 10.1111/oik.03213.
- 459 Pullin AS. 1986. Effect of photoperiod and temperature on the life-cycle of different  
460 populations of the peacock butterfly *Inachis io*. *Entomologia Experimentalis et*  
461 *Applicata* 41:237–242. DOI: 10.1111/j.1570-7458.1986.tb00534.x.

- 462 Qureshi M-H, Murai T, Yoshida H, Tsumuki H. 2000. Populational variation in diapause-  
463 induction and -termination of *Helicoverpa armigera* (Lepidoptera: Noctuidae).  
464 *Applied Entomology and Zoology* 35:357–360. DOI: 10.1303/aez.2000.357.
- 465 R Core Team. 2017. *R: A language and environment for statistical computing*. R Foundation  
466 for Statistical Computing, Vienna, Austria. URL: <https://www.R-project.org/>.
- 467 Raudenbush SW. 2009. Analyzing effect sizes: Random effects models. In: *The handbook of*  
468 *research synthesis and meta-analysis*. New York, USA: Russell Sage Foundation,  
469 295–315.
- 470 Reznik SY, Dolgovskaya MY, Ovchinnikov AN, Belyakova NA. 2015. Weak photoperiodic  
471 response facilitates the biological invasion of the harlequin ladybird *Harmonia*  
472 *axyridis* (Pallas) (Coleoptera: Coccinellidae). *Journal of Applied Entomology*  
473 139:241–249. DOI: 10.1111/jen.12158.
- 474 Riihimaa A, Kimura MT, Lumme J, Lakovaara S. 1996. Geographical variation in the larval  
475 diapause of *Chymomyza costata* (Diptera; Drosophilidae). *Hereditas* 124:151–164.  
476 DOI: 10.1111/j.1601-5223.1996.00151.x.
- 477 Rinker TW. 2017. *textreadr: Read Text Documents into R*. R package version 0.7.0.
- 478 Robinet C, Roques A. 2010. Direct impacts of recent climate warming on insect populations.  
479 *Integrative Zoology* 5:132–142. DOI: 10.1111/j.1749-4877.2010.00196.x.
- 480 Rohatgi A. 2017. *WebPlotDigitizer*. Austin, Texas, USA. URL:  
481 <https://automeris.io/WebPlotDigitizer/>
- 482 Ryan SF, Valella P, Thivierge G, Aardema ML, Scriber JM. 2018. The role of latitudinal,  
483 genetic and temperature variation in the induction of diapause of *Papilio glaucus*  
484 (Lepidoptera: Papilionidae). *Insect Science* 25:328–336. DOI: 10.1111/1744-  
485 7917.12423.



- 486 Sadakiyo S, Ishihara M. 2011. Rapid seasonal adaptation of an alien bruchid after  
487 introduction: geographic variation in life cycle synchronization and critical  
488 photoperiod for diapause induction. *Entomologia Experimentalis et Applicata*  
489 140:69–76. DOI: 10.1111/j.1570-7458.2011.01136.x.
- 490 Saikkonen K, Taulavuori K, Hyvönen T, Gundel PE, Hamilton CE, Vänninen I, Nissinen A,  
491 Helander M. 2012. Climate change-driven species' range shifts filtered by  
492 photoperiodism. *Nature Climate Change* 2:239–242. DOI: 10.1038/nclimate1430.
- 493 Schroeder M, Dalin P. 2017. Differences in photoperiod-induced diapause plasticity among  
494 different populations of the bark beetle *Ips typographus* and its predator *Thanasimus*  
495 *formicarius*. *Agricultural and Forest Entomology* 19:146–153. DOI:  
496 10.1111/afe.12189.
- 497 Seger J, Brockmann HJ. 1987. What is bet-hedging? In: *Oxford surveys in evolutionary*  
498 *biology* (4). Oxford, UK: Oxford University Press, 182–211.
- 499 Shimizu K, Fujisaki K. 2002. Sexual differences in diapause induction of the cotton  
500 bollworm, *Helicoverpa armigera* (Hb.) (Lepidoptera: Noctuidae). *Applied Entomology*  
501 *and Zoology* 37:527–533. DOI: 10.1303/aez.2002.527.
- 502 Shimizu K, Fujisaki K. 2006. Geographic variation in diapause induction under constant and  
503 changing conditions in *Helicoverpa armigera*. *Entomologia Experimentalis et*  
504 *Applicata* 121:253–260. DOI: 10.1111/j.1570-8703.2006.00483.x.
- 505 Shimizu T, Kawasaki K. 2001. Geographic variability in diapause response of Japanese *Orius*  
506 species. *Entomologia Experimentalis et Applicata* 98:303–316. DOI: 10.1046/j.1570-  
507 7458.2001.00787.x.
- 508 Shintani Y, Ishikawa Y. 1999. Transition of diapause attributes in the hybrid zone of the two  
509 morphological types of *Psacotha hilaris* (Coleoptera: Cerambycidae). *Environmental*  
510 *Entomology* 28:690–695. DOI: 10.1093/ee/28.4.690.

- 511 Shintani Y, Tatsuki S, Ishikawa Y. 1996. Geographic variation of photoperiodic response in  
512 larval development of the yellow-spotted longicorn beetle, *Psacotha hilaris* (pascoe)  
513 (Coleoptera: Cerambycidae). *Applied Entomology and Zoology* 31:495–504. DOI:  
514 10.1303/aez.31.495.
- 515 Shroyer DA, Craig GB. 1983. Egg diapause in *Aedes triseriatus* (Diptera: Culicidae):  
516 geographic variation in photoperiodic response and factors influencing diapause  
517 termination. *Journal of Medical Entomology* 20:601–607. DOI:  
518 10.1093/jmedent/20.6.601.
- 519 Simmons JP, Nelson LD, Simonsohn U. 2011. False-positive psychology: undisclosed  
520 flexibility in data collection and analysis allows presenting anything as significant.  
521 *Psychological Science* 22:1359–1366. DOI: 10.1177/0956797611417632.
- 522 Simons AM. 2011. Modes of response to environmental change and the elusive empirical  
523 evidence for bet hedging. *Proceedings of the Royal Society of London B: Biological*  
524 *Sciences* 278:1601–1609. DOI: 10.1098/rspb.2011.0176.
- 525 Simons AM. 2014. Playing smart vs. playing safe: the joint expression of phenotypic  
526 plasticity and potential bet hedging across and within thermal environments. *Journal*  
527 *of Evolutionary Biology* 27:1047–1056. DOI: 10.1111/jeb.12378.
- 528 Snell-Rood EC, Kobiela ME, Sikkink KL, Shephard AM. 2018. Mechanisms of plastic  
529 rescue in novel environments. *Annual Review of Ecology, Evolution, and Systematics*  
530 49:331–354. DOI: 10.1146/annurev-ecolsys-110617-062622.
- 531 So P-M, Takafuji A. 1992. Local variation in diapause characteristics of *Tetranychus urticae*  
532 Koch (Acarina: Tetranychidae). *Oecologia* 90:270–275. DOI: 10.1007/BF00317185.
- 533 Starrfelt J, Kokko H. 2012. Bet-hedging--a triple trade-off between means, variances and  
534 correlations. *Biological Reviews of the Cambridge Philosophical Society* 87:742–755.  
535 DOI: 10.1111/j.1469-185X.2012.00225.x.

- 536 Suwa A, Gotoh T. 2006. Geographic variation in diapause induction and mode of diapause  
537 inheritance in *Tetranychus pueraricola*. *Journal of Applied Entomology* 130:329–335.  
538 DOI: 10.1111/j.1439-0418.2006.01050.x.
- 539 Takeda M, Chippendale GM. 1982. Phenological adaptations of a colonizing insect: The  
540 southwestern corn borer, *Diatraea grandiosella*. *Oecologia* 53:386–393. DOI:  
541 10.1007/BF00389019.
- 542 Thackeray SJ, Henrys PA, Hemming D, Bell JR, Botham MS, Burthe S, Helaouet P, Johns  
543 DG, Jones ID, Leech DI, Mackay EB, Massimino D, Atkinson S, Bacon PJ, Brereton  
544 TM, Carvalho L, Clutton-Brock TH, Duck C, Edwards M, Elliott JM, Hall SJG,  
545 Harrington R, Pearce-Higgins JW, Høye TT, Kruuk LEB, Pemberton JM, Sparks TH,  
546 Thompson PM, White I, Winfield IJ, Wanless S. 2016. Phenological sensitivity to  
547 climate across taxa and trophic levels. *Nature* 535:241–245. DOI:  
548 10.1038/nature18608.
- 549 Tufto J. 2015. Genetic evolution, plasticity, and bet-hedging as adaptive responses to  
550 temporally autocorrelated fluctuating selection: A quantitative genetic model.  
551 *Evolution* 69:2034–2049. DOI: 10.1111/evo.12716.
- 552 Tyukmaeva VI, Salminen TS, Kankare M, Knott KE, Hoikkala A. 2011. Adaptation to a  
553 seasonally varying environment: a strong latitudinal cline in reproductive diapause  
554 combined with high gene flow in *Drosophila montana*. *Ecology and Evolution* 1:160–  
555 168. DOI: 10.1002/ece3.14.
- 556 Urban MC. 2015. Accelerating extinction risk from climate change. *Science* 348:571–573.  
557 DOI: 10.1126/science.aaa4984.
- 558 Urbanski J, Mogi M, O'Donnell D, DeCotiis M, Toma T, Armbruster P. 2012. Rapid  
559 adaptive evolution of photoperiodic response during invasion and range expansion

- 560 across a climatic gradient. *The American Naturalist* 179:490–500. DOI:  
561 10.1086/664709.
- 562 Van Walraven L, Langenberg VT, Dapper R, Witte JI, Zuur AF, van der Veer HW. 2015.  
563 Long-term patterns in 50 years of scyphomedusae catches in the western Dutch  
564 Wadden Sea in relation to climate change and eutrophication. *Journal of Plankton*  
565 *Research* 37:151–167. DOI: 10.1093/plankt/fbu088.
- 566 Vaz Nunes M, Koveos DS, Veerman A. 1990. Geographical variation in photoperiodic  
567 induction of diapause in the spider mite (*Tetranychus urticae*): a causal relation  
568 between critical nightlength and circadian period? *Journal of Biological Rhythms*  
569 5:47–57. DOI: 10.1177/074873049000500105.
- 570 Viechtbauer W. 2010. Conducting meta-analyses in R with the metafor package. *Journal of*  
571 *Statistical Software* 36:1–48.
- 572 Visser ME. 2008. Keeping up with a warming world; assessing the rate of adaptation to  
573 climate change. *Proceedings of the Royal Society of London B: Biological Sciences*  
574 275:649–659. DOI: 10.1098/rspb.2007.0997.
- 575 Visser ME, Gienapp P. 2019. Evolutionary and demographic consequences of phenological  
576 mismatches. *Nature Ecology & Evolution* 3:879. DOI: 10.1038/s41559-019-0880-8.
- 577 Waldock J, Chandra NL, Lelieveld J, Proestos Y, Michael E, Christophides G, Parham PE.  
578 2013. The role of environmental variables on *Aedes albopictus* biology and  
579 chikungunya epidemiology. *Pathogens and Global Health* 107:224–241. DOI:  
580 10.1179/2047773213Y.0000000100.
- 581 Wang X-P, Yang Q-S, Dalin P, Zhou X-M, Luo Z-W, Lei C-L. 2012. Geographic variation in  
582 photoperiodic diapause induction and diapause intensity in *Sericinus montelus*  
583 (Lepidoptera: Papilionidae). *Insect Science* 19:295–302. DOI: 10.1111/j.1744-  
584 7917.2011.01473.x.

- 585 Wickahm H. 2017. *tidyverse: Easily Install and Load the “Tidyverse”*. R package version  
586 1.2.1.
- 587 Wipking W. 1988. Repeated larval diapause and diapause-free development in geographic  
588 strains of the burnet moth *Zygaena trifolii* Esp. (Insecta, Lepidoptera). *Oecologia*  
589 77:557–564. DOI: 10.1007/BF00377274.
- 590 Yoshida T, Kimura TM. 1994. Relation of the circadian system to the photoperiodic clock in  
591 *Drosophila triauraria* (Diptera: Drosophilidae) : an approach from analysis of  
592 geographic variation. *Applied Entomology and Zoology* 29:499–505. DOI:  
593 10.1303/aez.29.499.
- 594 Yoshio M, Ishii M. 1998. Geographical variation of pupal diapause in the great mormon  
595 butterfly, *Papilio memnon* L. (Lepidoptera : Papilionidae), in Western Japan. *Applied*  
596 *Entomology and Zoology* 33:281–288. DOI: 10.1303/aez.33.281.
- 597 Zhang M, Duan H, Shi X, Yu Y, Kong F. 2012. Contributions of meteorology to the  
598 phenology of cyanobacterial blooms: Implications for future climate change. *Water*  
599 *Research* 46:442–452. DOI: 10.1016/j.watres.2011.11.013.
- 600 Zohner CM, Benito BM, Svenning J-C, Renner SS. 2016. Day length unlikely to constrain  
601 climate-driven shifts in leaf-out times of northern woody plants. *Nature Climate*  
602 *Change* 6:1120–1123. DOI: 10.1038/nclimate3138.
- 603 健一橋本, 和子飯島, 賢一小川. 2008. モンシロチョウ *Pieris rapae crucivora* Boisduval (  
604 チョウ目 : シロチョウ科) の蛹休眠を誘起する光周反応の地理的変異. 日本応  
605 用動物昆虫学会誌 52:201–206. DOI: 10.1303/jjaez.2008.201.
- 606 哲雄後藤, 徳純真梶. 1981. 日本産ナミハダニ *Tetranychus urticae* KOCH の休眠誘起の臨  
607 界日長とその地理的変異. 日本応用動物昆虫学会誌 25:113–118. DOI:  
608 10.1303/jjaez.25.113.

- 609 幸雄桑名. 1986. ブチヒゲヤナギドクガの光周反応と地理的起源. 日本応用動物昆虫学  
610 会誌 30:173–178. DOI: 10.1303/jjaez.30.173.
- 611 武氏家. 1985. キンモンホソガの休眠に関する研究. 日本応用動物昆虫学会誌 29:198–  
612 202. DOI: 10.1303/jjaez.29.198.
- 613 顕次藤本, 民人櫻井, 史郎中尾. 2014. アカメガシワクダアザミウマ雌成虫における休  
614 眠性の地理的変異. 日本応用動物昆虫学会誌 58:47–54. DOI:  
615 10.1303/jjaez.2014.47.
- 616
- 617
- 618

## 619 **Figure legends**

620 **Fig. 1. Relationship of evolutionary strategies with reaction norm properties.** Panel A  
621 shows a dichotomous reaction norm. The decision to switch phenotypes can be expressed by a  
622 steep logistic curve. Reaction norms can divert in various ways from this step function: By  
623 changes in the ratio (x-axis) and sum (y-axis) of the variance components  
624  $\sigma_{among}^2$  and  $\sigma_{within}^2$  (Panel B), and by changes in the mean (Panel C). Axes describe the  
625 resulting evolutionary strategies.

626  $\sigma_{among}^2 =$  squared standard deviation along environments ( $E_i$ ),  $\frac{\sum(p_{Ei} - \bar{pE})^2}{n}$ ;  $\sigma_{within}^2 =$  Variance  
627 of Bernoulli draws,  $\frac{\sum p_{Ei} * (1 - p_{Ei})}{n}$ ;  $r =$  variance composition,  $\frac{\sigma_{among}^2}{\sigma_{among}^2 + \sigma_{within}^2}$ ;  $s =$  phenotypic  
628 variance,  $\sigma_{among}^2 + \sigma_{within}^2$ .

629 **Fig. 2.: Winter onset calculation based on GHCN-daily climate data. A:** Mean winter onset,  
630 **B:** Standard deviation in winter onset (day length predictability). Standard deviations above 30  
631 received same color as standard deviations of 30. Black crosses: sampling locations of empirical  
632 studies.

633 **Fig. 3. Correlation of reaction norm properties with climate variables. A:** Critical  
634 photoperiod from primary studies versus latitude; **B:** Correlation of mean diapause timing with  
635 mean winter onset; **C:** Variance composition versus day length predictability. Ratios of 0  
636 indicate the potential for pure bet-hedging strategies, ratios of 1 equal purely plastic strategies;  
637 **D:** Residual deviation from diapause timing against winter predictability (conservative bet-  
638 hedging). Each data point represents 1 reaction norm (447 in total), size of the points scales  
639 with credibility (credible interval range for reliable points in dark grey). The legend indicates  
640 the number of reaction norms per order.

641

- 642 **Supplementary table S1:** Overview of studies from which reaction norms were extracted.
- 643 **Supplementary figure S2:** Correlation of day length at winter onset with latitude. Grey line:  
644 linear prediction between 21 and 69°N, grey points = points outside this prediction.
- 645 **Supplementary figure S3. Correlation of mean diapause timing with latitude.** Each data  
646 point represents 1 reaction norm (415 in total), size of the points scales with credibility (credible  
647 interval range for reliable points in dark grey). The legend indicates the number of reaction  
648 norms per order.
- 649 **Supplementary figure S4: Sensitivity of the meta-analysis to threshold choice.** The meta-  
650 analysis was repeated for parameter choices between 0 and 15. Panel A shows  $R^2_{total}$  for model  
651 1 (Mean diapause timing vs. mean winter onset), panel B for model 2 (variance composition  
652 vs. day length predictability).
- 653 **Supplementary material S5:** Supplementary methods
- 654 **Supplementary material S6:** Search terms for meta-analysis



**Supplementary table S1.** Overview of studies from which reaction norms were extracted.

| Order             | Genus                  | Species              | Populations | Reaction norms | Photo-periods                | Region                   | Reference                            |
|-------------------|------------------------|----------------------|-------------|----------------|------------------------------|--------------------------|--------------------------------------|
| Coleoptera        | <i>Acanthoscelides</i> | <i>pallidipennis</i> | 3           | 3              | 5                            | Japan                    | (Sadakiyo & Ishihara, 2011)          |
|                   | <i>Bruchidius</i>      | <i>dorsalis</i>      | 3           | 3              | 5                            | Japan                    | (Kurota & Shimada, 2003b)            |
|                   |                        | <i>dorsalis</i>      | 3           | 3              | 7                            | Japan                    | (Kurota & Shimada, 2003a)            |
|                   | <i>Harmonia</i>        | <i>axyridis</i>      | 4           | 4              | 5                            | Europe, Asia             | (Reznik et al., 2015)                |
|                   | <i>Ips</i>             | <i>typographus</i>   | 4           | 4              | 5                            | Europe                   | (Schroeder & Dalin, 2017)            |
|                   | <i>Leptinotarsa</i>    | <i>decemlineata</i>  |             | 5              | 6                            | 6                        | Europe                               |
|                   |                        |                      |             |                |                              |                          | (Shintani, Tatsuki & Ishikawa, 1996) |
| Diptera           | <i>Psacotheta</i>      | <i>hilaris</i>       | 6           | 6              | 5                            | Japan                    | (Shintani & Ishikawa, 1999)          |
|                   |                        | <i>hilaris</i>       | 8           | 11             | 4                            | Japan                    | (Urbanski et al., 2012)              |
|                   | <i>Aedes</i>           | <i>albopictus</i>    | 21          | 21             | 12                           | US, Japan                | (Beach, 1978)                        |
|                   |                        | <i>atropalpus</i>    | 3           | 3              | 5-7                          | US                       | (Jordan & Bradshaw, 1978)            |
|                   |                        | <i>sierrensis</i>    | 5           | 5              | 4-7                          | US                       | (Shroyer & Craig, 1983)              |
|                   |                        | <i>triseriatus</i>   | 8           | 8              | 10                           | US                       | (Kurahashi & Ohtaki, 1989)           |
|                   | <i>Boettcherisca</i>   | <i>peregrina</i>     | 6           | 6              | 8                            | Japan                    | (Riihimaa et al., 1996)              |
|                   | <i>Chymomyza</i>       | <i>costata</i>       | 8           | 14             | 6-8                          | Europe, Japan            | (Kimura, Bessho & Dai, 1993)         |
|                   | <i>Drosophila</i>      | <i>auraria</i>       | 8           | 8              | 4-5                          | Japan                    | (Kimura, 1984)                       |
|                   |                        | <i>auraria</i>       | 7           | 7              | 4-7                          | Japan                    | (Kimura, Bessho & Dai, 1993)         |
|                   |                        | <i>biauraria</i>     | 11          | 11             | 4-5                          | Japan                    | (Kimura, 1988)                       |
|                   |                        | <i>biauraria</i>     | 4           | 4              | 5                            | Japan                    | (Ichijo, 1986)                       |
|                   |                        | <i>lacertosa</i>     | 8           | 8              | 4-7                          | Japan                    | (Lumme & Oikarinen, 1977)            |
|                   |                        | <i>littoralis</i>    | 8           | 8              | 7-11                         | Europe                   | (Lankinen, 1986)                     |
|                   |                        | <i>littoralis</i>    | 11          | 18             | 5-9                          | Europe                   | (Pegoraro et al., 2017)              |
|                   |                        | <i>melanogaster</i>  | 6           | 6              | 6                            | Europe                   | (Tyukmaeva et al., 2011)             |
|                   |                        | <i>montana</i>       | 6           | 24             | 4-6                          | Europe                   | (Kimura, Bessho & Dai, 1993)         |
|                   |                        | <i>subauraria</i>    | 8           | 8              | 5-6                          | Japan                    | (Kimura, 1984)                       |
|                   | <i>subauraria</i>      | 4                    | 4           | 5-7            | Japan                        | (Kimura et al., 1994)    |                                      |
|                   | <i>takahashii</i>      | 5                    | 5           | 4              | Japan                        | (Yoshida & Kimura, 1994) |                                      |
| <i>triauraria</i> | 3                      | 3                    | 7-11        | Japan          | (Kimura, Bessho & Dai, 1993) |                          |                                      |
| <i>triauraria</i> | 10                     | 10                   | 4-5         | Japan          |                              |                          |                                      |

| Order              | Genus                 | Species             | Populations     | Reaction norms | Photo-periods | Region              | Reference                                |                            |
|--------------------|-----------------------|---------------------|-----------------|----------------|---------------|---------------------|------------------------------------------|----------------------------|
|                    |                       | <i>triauraria</i>   | 4               | 4              | 5-6           | Japan               | (Kimura, 1984)                           |                            |
| <b>Hemiptera</b>   | <i>Wyeomyia</i>       | <i>smithii</i>      | 16              | 16             | 16-21         | US                  | (Bradshaw, Quebodeaux & Holzapfel, 2003) |                            |
|                    | <i>Laodelphax</i>     | <i>striatellus</i>  | 3               | 3              | 5-6           | Asia                | (Hou et al., 2016)                       |                            |
|                    | <i>Nezara</i>         | <i>viridula</i>     | 5               | 5              | 5-8           | Japan               | (Musolin, Tougou & Fujisaki, 2011)       |                            |
|                    | <i>Orius</i>          | <i>sauteri</i>      | 5               | 5              | 6-8           | Japan               | (Shimizu & Kawasaki, 2001)               |                            |
|                    |                       | <i>sauteri</i>      | 8               | 8              | 6-8           | Japan               | (Ito & Nakata, 2000)                     |                            |
| <b>Homoptera</b>   | <i>Rhopalosiphum</i>  | <i>padi</i>         | 3               | 3              | 11            | Europe              | (Lushai & Harrington, 1996)              |                            |
|                    | <i>Laodelphax</i>     | <i>striatellus</i>  | 8               | 8              | 6-8           | Japan               | (Noda, 1992)                             |                            |
| <b>Hymenoptera</b> | <i>Asobara</i>        | <i>japonica</i>     | 9               | 9              | 5             | Japan               | (Murata et al., 2013)                    |                            |
| <b>Lepidoptera</b> | <i>Nasonia</i>        | <i>vitripennis</i>  | 7               | 7              | 8             | Europe              | (Paolucci, Zande & Beukeboom, 2013)      |                            |
|                    | <i>Atrophaneura</i>   | <i>alcinous</i>     | 6               | 6              | 5             | Japan               | (Kato, 2005)                             |                            |
|                    | <i>Diatraea</i>       | <i>grandiosella</i> | 3               | 3              | 6             | US                  | (Takeda & Chippendale, 1982)             |                            |
|                    | <i>Helicoverpa</i>    | <i>armigera</i>     | <i>armigera</i> | 5              | 5             | 6                   | Asia                                     | (Chen et al., 2013)        |
|                    |                       | <i>armigera</i>     | <i>armigera</i> | 3              | 3             | 6                   | Japan                                    | (Qureshi et al., 2000)     |
|                    |                       | <i>armigera</i>     | <i>armigera</i> | 3              | 3             | 4-5                 | Japan                                    | (Shimizu & Fujisaki, 2006) |
|                    |                       | <i>armigera</i>     | <i>armigera</i> | 3              | 3             | 5                   | Japan                                    | (Shimizu & Fujisaki, 2002) |
|                    | <i>Hyphantria</i>     | <i>cunea</i>        | <i>cunea</i>    | 4              | 4             | 4-5                 | Japan                                    | (Gomi & Takeda, 1996)      |
|                    |                       | <i>cunea</i>        | <i>cunea</i>    | 3              | 3             | 4-6                 | Japan                                    | (Gomi et al., 2009)        |
|                    | <i>Inachis</i>        | <i>io</i>           | 3               | 3              | 9             | Europe              | (Pullin, 1986)                           |                            |
|                    | <i>Leucoma</i>        | <i>candida</i>      | 5               | 5              | 4-5           | Japan               | (幸雄, 1986)                               |                            |
|                    | <i>Papilio</i>        | <i>glaucus</i>      | <i>glaucus</i>  | 3              | 3             | 8-11                | US                                       | (Ryan et al., 2018)        |
|                    |                       | <i>memnon</i>       | <i>memnon</i>   | 4              | 4             | 8                   | Japan                                    | (Yoshio & Ishii, 1998)     |
|                    | <i>Phyllonorycter</i> | <i>ringoniella</i>  | 5               | 5              | 4             | Japan               | (武, 1985)                                |                            |
|                    | <i>Pieris</i>         | <i>rapae</i>        | 7               | 7              | 5-8           | Japan               | (健一, 和子 & 賢一, 2008)                      |                            |
| <i>Sericinus</i>   | <i>montelus</i>       | 6                   | 6               | 9              | Asia          | (Wang et al., 2012) |                                          |                            |
| <i>Zygaena</i>     | <i>trifolii</i>       | <i>trifolii</i>     | 5               | 5              | 8-11          | Europe              | (Wipking, 1988)                          |                            |
|                    | <i>oculata</i>        | <i>oculata</i>      | 9               | 9              | 4-6           | US                  | (Nechols, Tauber & Tauber, 1987)         |                            |
| <b>Neuroptera</b>  | <i>Chrysopa</i>       | <i>oculata</i>      | 9               | 9              | 4-6           | US                  | (Nechols, Tauber & Tauber, 1987)         |                            |

| Order          | Genus              | Species             | Populations | Reaction norms | Photo-periods | Region | Reference                           |
|----------------|--------------------|---------------------|-------------|----------------|---------------|--------|-------------------------------------|
| Thysanoptera   | <i>Haplothrips</i> | <i>brevitubus</i>   | 3           | 13             | 6             | Japan  | (顯次, 民人 & 史郎, 2014)                 |
|                | <i>Thrips</i>      | <i>nigropilosus</i> | 6           | 6              | 4-6           | Japan  | (Nakao, 2011)                       |
| Trombidiformes | <i>Tetranychus</i> | <i>pueraricola</i>  | 33          | 33             | 5             | Japan  | (Suwa & Gotoh, 2006)                |
|                |                    | <i>urticae</i>      | 10          | 10             | 7-9           | Europe | (Vaz Nunes, Koveos & Veerman, 1990) |
|                |                    | <i>urticae</i>      | 5           | 5              | 6-8           | Japan  | (So & Takafuji, 1992)               |
|                |                    | <i>urticae</i>      | 8           | 8              | 7-12          | Europe | (Koveos, Kroon & Veerman, 1993)     |
|                |                    | <i>urticae</i>      | 6           | 6              | 5-11          | Japan  | (哲雄 & 徳純, 1981)                     |

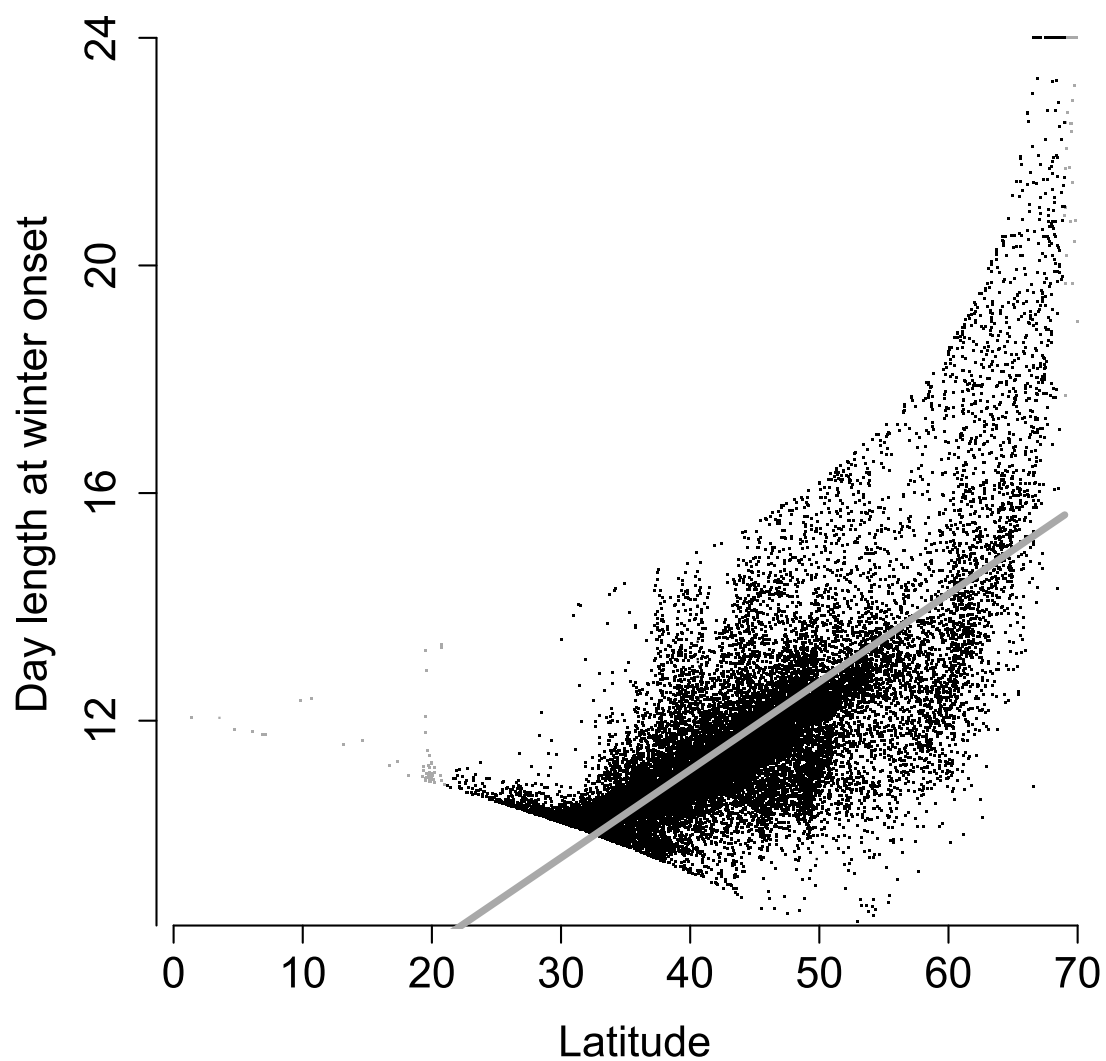

**Supplementary figure S2:** Correlation of day length at winter onset with latitude. Grey line: linear prediction between 21 and 69°N, grey points = points outside this prediction.

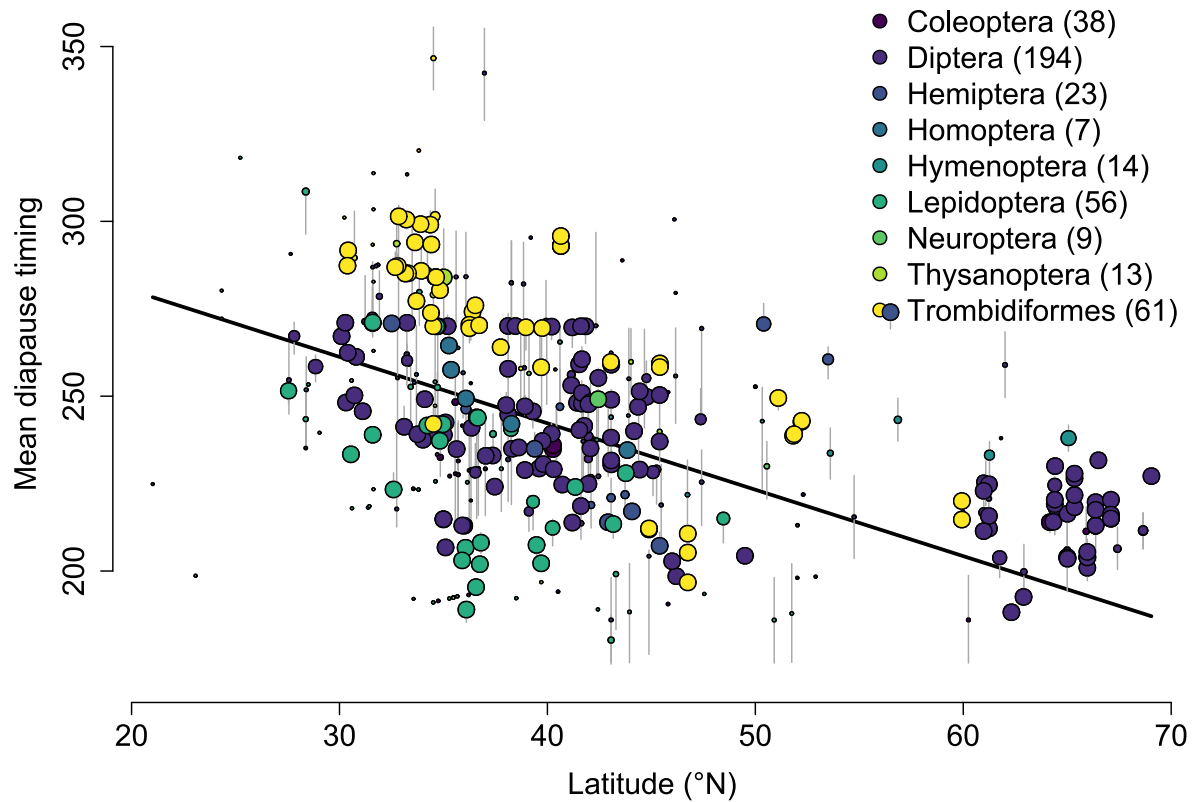

**Supplementary figure S3: Correlation of mean diapause timing with latitude.** Each data point represents 1 reaction norm (415 in total), size of the points scales with credibility (credible interval range for reliable points in dark grey). The legend indicates the number of reaction norms per order.

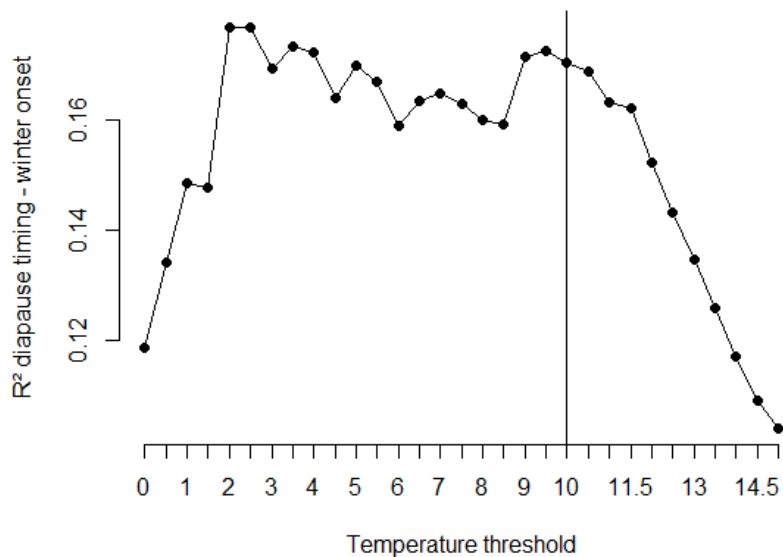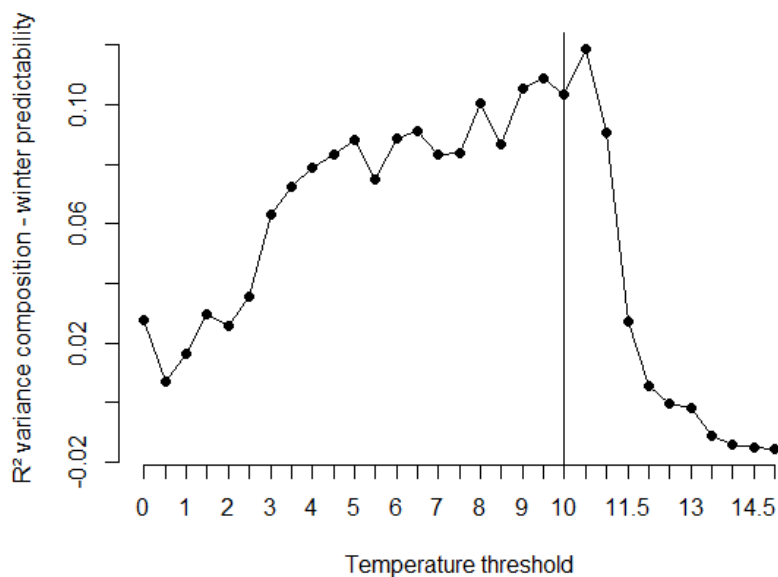

**Supplementary Figure S4: Sensitivity of the meta-analysis to threshold choice.** The meta-analysis was repeated for parameter choices between 0 and 15. Panel A shows  $R^2_{total}$  for model 1 (Mean diapause timing vs. mean winter onset), panel B for model 2a (variance composition vs. day length predictability).

## 2 **Supplementary material S5: Supplementary methods**

### 3 **1. Empirical data**

4

#### 5 *Literature search*

6 In our literature search for diapause reaction norms we concentrated on studies that measure  
7 photoperiodic response curves of terrestrial arthropods, though invertebrates with a larval stage  
8 in shallow water (e.g. mosquitoes) were also included. We only used studies with estimates for  
9 at least three populations and four photoperiods. To maximize sample sizes, we did not restrict  
10 our analysis to any geographic location or publication language.

11 We conducted two independent literature searches in the Web of Science core collection (see  
12 Figure). First (26.11.2018) we limited the search terms to:

13  $TS = ((\textit{photoperiodic AND (geogr* OR range)}) OR (\textit{photoperiod* AND latitud*}) OR$   
14  $(\textit{photoperiod* AND longitud*}))$

15 We found 1683 references in the first search, of which we judged 278 potentially relevant, and  
16 57 met all eligibility criteria. Secondly (28.11.2018), we used a wider range of search terms,

17  $TS = ((\textit{"day length" OR photoperiod* OR diapaus* OR hibern* OR dorman*}) AND (geogr*$   
18  $OR \textit{"range" OR latitud* OR longitud* OR cline$ OR clinal}))$

19 but excluded all articles that were found in the first search, as well as all review articles,  
20 retractions and corrections. We then filtered the 6179 results by research area and invertebrate-  
21 related terms. The original search strings can be found in supplementary Material S6. In short,  
22 we included:

23 1) all entomological articles (600 articles)

- 24 2) articles with invertebrate taxa (75 terms) named in title, keywords or abstract (838  
25 articles)
- 26 3) zoological articles that name no vertebrate (61 terms) in the title (186 articles)
- 27 4) articles from ecology, evolutionary biology and genetics which name no vertebrate,  
28 plant or microbe (80 terms) in their title (523 articles).
- 29 5) articles from relevant other topics (11 topics) that name no human psychological  
30 condition, vertebrate, plant or microbe (85 terms) in their title (267 articles)

31 From these 2414 articles we excluded all references that name aquatic environments, unless  
32 they also named terrestrial environments. 2362 articles remained, with 355 potentially relevant  
33 and 13 eligible articles. We did a forward-citation search on the 70 eligible articles of both  
34 searches on 4.12.2018 and found 790 new references, which included 117 potential and 4  
35 eligible articles. A second forward-citation search on these four articles on 5.12.2018 brought  
36 118 new articles, but none were relevant. One further article was found to be wrongly tagged  
37 as negative after the search was closed. Altogether there were 75 useful references (623  
38 populations).

### 39 *Inclusion criteria*

40 12 articles (147 populations) were excluded because they were not accompanied by raw data,  
41 tables or figures that allowed further analysis, and the authors were deceased, did no longer  
42 have the raw data or did not respond to our emails. We further removed six articles (26  
43 populations) that were otherwise not usable. From the remaining 57 studies we removed 43  
44 further individual populations with less than three day length measurements, and five  
45 populations from the southern hemisphere, so 402 populations remained. Because some studies  
46 reported reaction norms for multiple lines from the same population, there were 447 reaction  
47 norms available, and these 447 reaction norms consisted of 3035 individual data points.



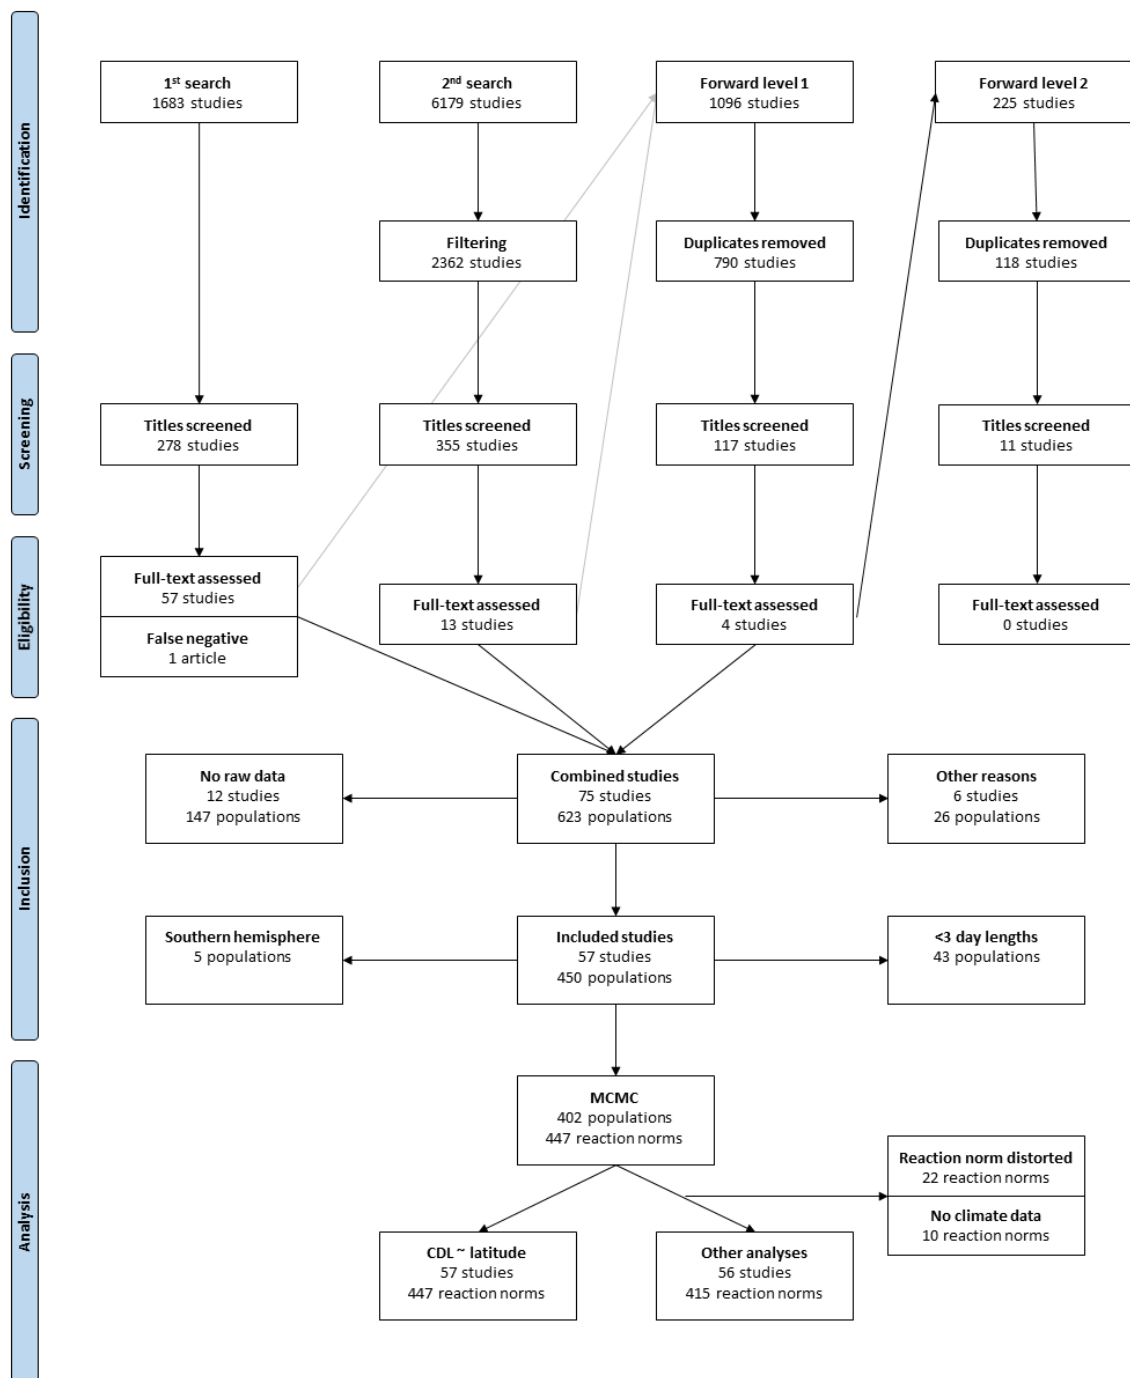

48

49 Prisma Scheme

## 50 *Data extraction*

51 The reaction norms in 49 of the 57 studies were presented as figures. In these cases we saved  
52 the figure and extracted the data with WebPlotDigitizer Version 3.12 (Rohatgi, 2017). Where  
53 necessary, the day length was then rounded or corrected to match the description in materials  
54 and methods of the respective study. Y-values that were slightly above 100% or below 0% were  
55 set to 100% and 0% respectively.

56 Detailed information on numbers of individuals per day length estimate were rarely available  
57 (97 reaction norms), as numbers were either given as population-level means (26 reaction  
58 norms), as global average or range (291 reaction norms), or missed entirely (33 reaction  
59 norms). We wish to emphasize that a lack of detailed information should not be confused with  
60 an unweighted (“vote-count”) meta-analysis, because the sample size (day lengths per  
61 population) was always known. Rather, the missing information occurred on a lower level  
62 (points within population) than the level of replication (population). Where the data was  
63 provided, we recorded it for later weighing of the data points.

64

## 65 *Calculation of mean and variance composition*

66 The published reaction norms reported the change of diapause percentages with day length.  
67 Day length depends, however, on latitude, and thus is not a direct indicator of phenology.  
68 Hence, we converted day lengths into julian days, by using the reported latitude of the sampling  
69 location and the *daylength* function from the package *geosphere* (Hijmans, 2017). For 310  
70 reaction norms one or more day length treatments were outside naturally occurring day lengths  
71 given the latitude in which the populations were sampled. 588 day length treatments were  
72 longer than midsummer days and 140 were shorter than midwinter days; in total this affected  
73 728 day length treatments, or 24% of the data. We assumed that these artificial day lengths  
74 represent diapause incidence at midsummer and midwinter, respectively, but removed 22

75 reaction norms that became severely distorted by this assumption. All further analysis except  
76 the correlation of critical photoperiod with latitude are based on the converted reaction norms.

77

78 We specified the reaction norm shape via four parameters:

79

$$80 \quad p(x) = c + \frac{(d-c)}{1+\exp(b*(x-e))} \quad (\text{eq. 1})$$

81

82 In this equation  $p(x)$  is the frequency of diapausing individuals under julian day  $x$ .  $e$  influences  
83 the inflection point of the curve, and hence directly represents the axis *mean*.  $c$  and  $d$  indicate  
84 the lower and upper diapause threshold, and  $b$  is the slope of the curve. The *variance*  
85 *composition* can then be defined as the ratio of variance between and among environments  
86 (Fig. 1). The variance within each environment is that of a Bernoulli draw:  $p_x * (1-p_x)$ . Because  
87 a reaction norm consists of multiple  $p$  along an environmental gradient (day length treatments),  
88 we define the variance within environments as:

89

$$90 \quad \sigma_{within}^2 \stackrel{\text{def}}{=} \frac{\sum p_x*(1-p_x)}{n}; n = \text{number of treatments} \quad (\text{eq. 2})$$

91

92  $\sigma_{within}^2$  constitutes a potential diversified bet-hedging trait and is maximized by a flat reaction  
93 norm at the 0.5 level.

94 We define the variance among treatments as the squared standard deviation,

95

$$96 \quad \sigma_{among}^2 \stackrel{\text{def}}{=} \frac{\sum (p_x - \bar{p}_x)^2}{n-1} \quad (\text{eq.3})$$

97

98 This component may represent phenotypic plasticity and is maximized by a steep reaction  
99 norm. The *variance composition* can then be defined as the ratio of the two components:

100

$$101 \quad r = \frac{\sigma_{among}^2}{\sigma_{among}^2 + \sigma_{within}^2} \quad (\text{eq. 4})$$

102

103 Lastly, *phenotypic variance* describes the magnitude of phenotypic variation, and can be  
104 regarded the sum of the two variance components,

105

$$106 \quad \sigma_p^2 = \sigma_{among}^2 + \sigma_{within}^2 \quad (\text{eq. 5})$$

107

108 *Phenotypic variance* is zero for flat reaction norms at the 0 % level, and increases as the  
109 phenotype move away from 0% in some ( $\sigma_{among}^2$ ) or all ( $\sigma_{within}^2$ ) environments.

110

111 We derived midpoints and variance composition from reaction norms, but the data was  
112 relatively scarce (on average seven data points per reaction norm). Hence standard non-linear  
113 regression techniques did not always yield reasonable estimates, for example the slope could  
114 not be estimated when there was only one data point present on the sloped part of the reaction  
115 norm. Nevertheless, the range of the possible parameter space can be estimated with Markov  
116 chain Monte Carlo methods. We thus estimated the 4-dimensional credible parameter space  
117 and calculated the variance components based on this parameter space.

118

### 119 *MCMC specifications*

120 We used rjags (Plummer, 2018) to run Markov chain simulations on each of the 447 reaction  
121 norms. We ran 4 replicate chains with lengths of 11,000 iterations and discarded a burn-in of  
122 1,000 iterations. We specified our model with (eq. 1), and consequently chose the binomial

123 density function to estimate the likelihood. If specified in the primary study, we used the sample  
124 sizes of each day length treatment as number of trials, otherwise we used the global average of  
125 the study. For those studies that did not mention sample sizes, we used a global average of 100  
126 trials for each of the data points. We implemented uninformative priors for all four parameters.  
127 These were:

128

129  $b \sim \text{unif} \{-100, 100\}$

130  $c \sim \text{unif} \{0, 1\}$

131  $d \sim \text{unif} \{c, 1\}$

132  $e \sim \text{unif} \{D_{\min}, D_{\max}\}$ , with  $D_{\min}$  and  $D_{\max}$  being the range of applied day length treatments,  
133 converted in julian days.

134

135 The upper limit of the logit-function was constrained to be higher than the lower limit, because  
136 otherwise switching between the two equal solutions (positive slope,  $d > c$  and negative slope,  
137  $c < d$ ) would render the chain unidentifiable. Despite the relative data scarcity, the four replicate  
138 Markov chains mixed well in nearly all cases, providing a well-defined frequency distribution  
139 (Supp S2). We repeated the analyses on the untransformed day length reaction norms to obtain  
140 a critical day length estimate that is comparable to those obtained in earlier studies.

141

142 The MCMC algorithms provided a 4-dimensional parameter space to define continuous  
143 reaction norms, and we calculated the variance components of those curves that fall within the  
144 credible intervals. To do so, we followed the trace of the MCMC algorithm. For each iteration  
145 step we sampled 1000 equally spaced day lengths around the proposed inflection point  $e \pm 100$   
146 days, and performed the variance calculations (eq. 2-5) on the proposed parameters  $b, c, d$  and

147 *e.* Following the logic of the MCMC algorithm, we reported the 0.025 and 0.975 quantiles of  
148 the resulting frequency distribution as credible intervals.

149

## 150 **2. climate data**

151 We used land surface temperature data from the Global Historical Climatology Network  
152 GHCN-Daily (Menne et al., 2012a,b). We extracted daily minimum and maximum  
153 temperatures from ~34,000 climate stations and then calculated daily mean temperature as the  
154 average of the extremes. After cleaning the data to stations in the northern hemisphere and with  
155 at least 3 years of data with 180 temperature records, the data consisted of 10,991,727 months  
156 (3-244 years) in 26,804 climate stations.

157 To estimate winter onset in each year and station, we identified cold days with average  
158 temperatures below 10°C. We then determined winter onset as the fifth cold day after  
159 midsummer. Years in which winter did not arrive according to this definition were excluded,  
160 and stations with less than 3 years with winter onset removed. We calculated a weighted mean  
161 winter onset and a frequency weighed standard deviation of winter onset to account for  
162 differences in reliability (days with eligible data) across years. We obtained 25,340 estimates  
163 of mean winter onset, day length at winter onset and winter predictability in the northern  
164 hemisphere.

165 Initial data handling was performed with a perl script, whereas all further analysis was  
166 conducted in R version 3.4.3 (R Core Team), using R base functions and convenience functions  
167 (Bache & Wickham, 2014; Dowle & Srinivasan, 2017; Rinker, 2017; Wickahm, 2017; Becker  
168 et al., 2018; Duncan Temple Lang and the CRAN team, 2018; Garnier, 2018).

169

170

171 *Merging with empirical data*

172 To combine climate data and study site locations, we averaged the climate estimates from the  
173 5 closest stations within a 5° radius (weighted by 1/Euclidian distance). When the coordinates  
174 were not directly provided in the study, we used the coordinates of the quoted town or area.  
175 Town and area coordinates were made available by the WikiProject Geographical coordinates  
176 ([https://en.wikipedia.org/wiki/Wikipedia:WikiProject\\_Geographical\\_coordinates](https://en.wikipedia.org/wiki/Wikipedia:WikiProject_Geographical_coordinates)) and the  
177 Geohack tool (<https://www.mediawiki.org/wiki/GeoHack>). 10 populations did not have any  
178 climate station nearby and were only used for correlations with latitude, but not in any further  
179 analysis.

180

181 **3. Analysis**

182 We used linear mixed-effects models with a nested random structure (Viechtbauer, 2010) to  
183 correlate the reaction norm properties with climate variables. The random effects were nested  
184 on five levels (population/study/species/genus/order), but we simplified the random structure  
185 to populations/species/order, ignoring both study ID and genus. Study ID was disregarded  
186 because most species were only represented by a single study, and those species that were  
187 represented by multiple studies usually contained the same first or lead authors and applied the  
188 same methods (Table 1). Genus was disregarded because there were either only very few genera  
189 per order available (e.g. Diptera), or all species within an order were placed in different genera  
190 (Lepidoptera, Table 1). We weighed the reaction norm estimates by the inverse of the variance  
191 (credible interval ranges, divided by 2\*1.96 and squared), but truncated the intervals at the  
192 lower limit to a biologically meaningful value to prevent some estimates from obtaining nearly  
193 infinite weight.

194

195

196 We performed the following models (credible interval truncation in brackets):

197 0a) Critical photoperiod was correlated with latitude, using the day length reaction norms  
198 (10 minutes)

199 0b) Mean diapause timing was correlated with latitude, using the julian day reaction  
200 norms (1 week)

201 1) *arithmetic mean optimization*: Mean diapause timing was correlated with mean winter  
202 onset (1 week)

203 2) *phenotypic plasticity / diversified bet-hedging*: The ratio of the variances (e.q. 4) was  
204 correlated with winter predictability (5%)

205 3) *conservative bet-hedging*: the residuals of model 1 were correlated with winter  
206 predictability (5%).

207 We used the full dataset (447 reaction norms) for model 0a), but removed all reaction norms  
208 that were not convertible into julian days or had no nearby climate stations (415 remaining) for  
209 all other models.

210 We assumed a gaussian distribution for all models, though we logit-transformed variance ratios  
211 prior to analysis. For all models we report partial R<sup>2</sup> values, calculated as proportion of variance

212 reduction at each random level,  $\frac{\partial^2_{random} - \partial^2_{mixed}}{\partial^2_{random}}$ . This is an extension of a commonly used

213 pseudo-R<sup>2</sup> value (Raudenbush, 2009). In addition, we provide likelihood ratio test statistics.

214 Model 3 was conducted without the nested random terms, because their effect was already  
215 accounted for by model 1.

216

217



218 *Sensitivity of climate predictions to temperature threshold*

219 Arthropod thermal requirements vary among species, and our use of a 10°C temperature  
220 threshold was an arbitrary decision. It resulted in a global median winter onset around Oct 11,  
221 which is within the range of commonly reported phenological windows and threshold values  
222 (Halkett et al., 2004; Waldoek et al., 2013). To explore the sensitivity of our meta-analysis to  
223 the arbitrary threshold, we systematically varied it between 0 and 15°C, and calculated the R<sup>2</sup>  
224 profiles of models 1 and 2.

225

## 226 **Supplementary material S6: Search terms**

227 Below are the exact search terms, with search ID and number of hits in red.

228 **#1** TS = ((photoperiodic AND (geogr\* OR range)) OR (photoperiod\* AND latitud\*) OR  
229 (photoperiod\* AND longitud\*)) **1684**

**#2** (TS = (("day length" OR photoperiod\* OR diapaus\* OR hibern\* OR dorman\* ) AND  
(geogr\* OR "range" OR latitud\* OR longitud\* OR cline\$ OR clinal)) not #1) AND

**DOCUMENT TYPES:** (Article OR Abstract of Published Item OR Art Exhibit Review OR  
Bibliography OR Biographical-Item OR Book OR Book Chapter OR Book Review OR  
Chronology OR Dance Performance Review OR Data Paper OR Database Review OR  
Discussion OR Early Access OR Editorial Material OR Excerpt OR Fiction, Creative Prose  
OR Film Review OR Hardware Review OR Item About an Individual OR Letter OR Music  
Performance Review OR Music Score OR Music Score Review OR News Item OR Note  
OR Poetry OR Proceedings Paper OR Record Review OR Reprint OR Script OR Software  
Review OR TV Review, Radio Review OR TV Review, Radio Review Video OR Theater  
Review) **6179**

230

231 **#3** #2 and SU = "entomology" **600**

**#4** #2 not #3 AND TS =(invertebrat\* OR worm\* OR annelid\* OR platyhelminth\* OR  
nematod\* OR mollusc\* OR gastropod\* OR slug\* OR snail\* OR arthropod\* OR chelicer\*  
OR arachnid\* OR aranea\* OR acari OR tetranych\* OR ixod\* OR opilion\* OR spider\* OR  
\*scorpio\* OR tick\$ OR mite\$ OR harvestmen OR crustace\* OR malostraca\* OR isopod\*  
OR woodlice OR oniscid\* OR armadillium OR myriapod\* OR chilopod\* OR diplopod\* OR  
pauropod\* OR symphyla OR millipede\* OR centipede\* OR hexapod\* OR collembol\* OR

springtail\* OR insect\$ OR blattodea OR \*ptera OR mantodea OR odonata OR phasmatodea  
OR psocodea OR thysanura OR zygentoma OR psyllid\* OR stenorrhyn\* OR cockroach\*  
OR beetle\$ OR earwig\* OR \*fly OR \*flies OR droso\* OR mosquit\* OR \*bug\$ OR aphid\*  
OR adelgid\* OR phyllox\* OR \*wasp\$ OR (\*bee OR \*bees) OR (ant OR ants) OR mantis  
OR grasshopper\* OR locust\* OR cricket\* OR louse OR lice OR flea\$ OR moth\$ OR thrip\*  
OR silverfish ) NOT TI = (paleo\* or \$chiroptera\*) 838

232

#5 #2 not #3 not #4 AND SU = "Zoology" NOT TI =( palaeo\* OR \$vertebra\* OR \*fish\*  
OR \$amphib\* OR \$salientia\* OR \$anura\* OR \$caudata OR \$salamand\* OR newt\$ OR  
\$gymnophion\* OR frog\$ OR tadpole\$ OR toad\$ OR \$reptil\* OR \$crocodil\* OR \*sauria\*  
OR \$squamat\* OR \$lizard\* OR \$lacert\* OR \$gekko\* OR \$serpent\* OR \$snake\* OR  
\$testudin\* OR \$turtle\* OR \$tortois\* OR \$mammal\* OR \$rodent\* OR \$sciurid\* OR  
\$hamster\* OR \*mouse\* OR \*mice\* OR \$squirrel\* OR \$rabbit\* OR \$hare OR \$hares OR  
\$chiropt\* OR \$bat OR \$bats OR \$myotis OR \$sorciomorpha OR \$soricid\* OR \$talpid\* OR  
\$shrew\* OR \$marmot\* OR \$mole OR \$moles OR \$primat\* OR \$carnivora OR \$ursid\* OR  
\$ursus OR \$felid OR \$felids OR "\$sea lion" OR "\$fur seal" OR "\$elephant seal" OR  
\$marsupi\* OR \$goat\* OR \$sheep\* OR \$deer OR \$cattle OR estrus OR suprachiasm\*) 186

233

#6 #2 not #3 not #4 AND SU = (ENVIRONMENTAL SCIENCES ECOLOGY OR  
EVOLUTIONARY BIOLOGY OR GENETICS HEREDITY OR BIODIVERSITY  
CONSERVATION OR SOIL SCIENCE NOT Zoology) NOT TI = ( palaeo\* OR \$vertebra\*  
OR \*fish\* OR \$amphib\* OR \$salientia\* OR \$anura\* OR \$caudata OR \$salamand\* OR  
newt\$ OR \$gymnophion\* OR frog\$ OR tadpole\$ OR toad\$ OR \$reptil\* OR \$crocodil\* OR  
\*sauria\* OR \$squamat\* OR \$lizard\* OR \$lacert\* OR \$gekko\* OR \$serpent\* OR \$snake\*

OR \$testudin\* OR \$turtle\* OR \$tortois\* OR \$mammal\* OR \$rodent\* OR \$sciurid\* OR  
\$hamster\* OR \*mouse\* OR \*mice\* OR \$squirrel\* OR \$rabbit\* OR \$hare OR \$shares OR  
\$chiropt\* OR \$bat OR \$bats OR \$myotis OR \$sorciomorpha OR \$soricid\* OR \$talpid\* OR  
\$shrew\* OR \$marmot\* OR \$mole OR \$moles OR \$primat\* OR \$carnivora OR \$ursid\* OR  
\$ursus OR \$felid OR \$felids OR "\$sea lion" OR "\$fur seal" OR "\$elephant seal" OR  
\$marsupi\* OR \$goat\* OR \$sheep\* OR \$deer OR \$cattle OR estrus OR suprachiasm\*OR  
microb\* OR bacteria\* OR fung\* OR \*ceae OR bloom OR yield OR germination OR  
molecular OR simulation OR QTL OR spring OR cell\* OR tiller OR cultivar\* OR bud\* OR  
chill\* OR (tree NEAR phenology)) 523

234

#7 #2 not #3 not #4 not #5 not #6 NOT SU = (ENTOMOLOGY OR ZOOLOGY OR  
ENVIRONMENTAL SCIENCES ECOLOGY OR EVOLUTIONARY BIOLOGY OR  
GENETICS HEREDITY OR BIODIVERSITY CONSERVATION OR SOIL SCIENCE  
OR AGRICULTURE OR PLANT SCIENCES OR FORESTRY OR FOOD SCIENCE  
TECHNOLOGY) AND SU =(SCIENCE TECHNOLOGY OTHER TOPICS OR LIFE  
SCIENCES BIOMEDICINE OTHER TOPICS OR ENDOCRINOLOGY METABOLISM  
OR NEUROSCIENCES NEUROLOGY OR PHYSIOLOGY OR REPRODUCTIVE  
BIOLOGY OR INFECTIOUS DISEASES OR BEHAVIORAL SCIENCES OR  
ANATOMY MORPHOLOGY OR HEMATOLOGY OR HEALTH CARE SCIENCES  
SERVICES ) NOT TI = (human OR sleep\* OR disorder OR depress\* OR palaeo\* OR  
\$vertebra\* OR \*fish\* OR \$amphib\* OR \$salientia\* OR \$anura\* OR \$caudata OR  
\$salamand\* OR newt\$ OR \$gymnophion\* OR frog\$ OR tadpole\$ OR toad\$ OR \$reptil\*  
OR \$crocodil\* OR \*sauria\* OR \$squamata\* OR \$lizard\* OR \$lacert\* OR \$gekko\* OR  
\$serpent\* OR \$snake\* OR \$testudin\* OR \$turtle\* OR \$tortois\* OR \$mammal\* OR

\$rodent\* OR \$sciurid\* OR \$hamster\* OR \*mouse\* OR \*mice\* OR \$squirrel\* OR \$rabbit\*  
OR \$hare OR \$hares OR \$chiropt\* OR \$bat OR \$bats OR \$myotis OR \$sorciomorpha OR  
\$soricid\* OR \$talpid\* OR \$shrew\* OR \$marmot\* OR \$mole OR \$moles OR \$primat\* OR  
\$carnivora OR \$ursid\* OR \$ursus OR \$felid OR \$felids OR "\$sea lion" OR "\$fur seal" OR  
"\$elephant seal" OR \$marsupi\* OR \$goat\* OR \$sheep\* OR \$deer OR \$cattle OR estrus OR  
suprachiasm\*OR microb\* OR bacteria\* OR fung\* OR \*ceae OR bloom OR yield OR  
germination OR molecular OR simulation OR QTL\* OR arabidopsis OR spring OR cell\*  
OR tiller OR cultivar\* OR bud\* OR chill\* OR (tree NEAR phenology)) 267

235

#8 (#3 or #4 or #5 or #6 or #7 AND TS = (terrest\*) ) or (#3 or #4 or #5 or #6 or #7 not TS =  
(marine\* OR aquat\* OR limno\* OR water )) 2362

236

237

## 238 **References**

- 239 Bache SM, Wickham H. 2014. *magrittr: A Forward-Pipe Operator for R*.
- 240 Beach R. 1978. The required day number and timely induction of diapause in geographic  
241 strains of the mosquito *Aedes atropalpus*. *Journal of Insect Physiology* 24:449–455.  
242 DOI: 10.1016/0022-1910(78)90088-4.
- 243 Becker RA, Wilks AR, Brownrigg R, Minka TP, Deckmyn A. 2018. *maps: Draw Geographical*  
244 *Maps*.
- 245 Bradshaw WE, Quebodeaux MC, Holzapfel CM. 2003. Circadian rhythmicity and  
246 photoperiodism in the pitcher-plant mosquito: adaptive response to the photic  
247 environment or correlated response to the seasonal environment? *The American*  
248 *Naturalist* 161:735–748. DOI: 10.1086/374344.
- 249 Chen Y-S, Chen C, He H-M, Xia Q-W, Xue F-S. 2013. Geographic variation in diapause  
250 induction and termination of the cotton bollworm, *Helicoverpa armigera* Hübner  
251 (Lepidoptera: Noctuidae). *Journal of Insect Physiology* 59:855–862. DOI:  
252 10.1016/j.jinsphys.2013.06.002.
- 253 Dowle M, Srinivasan A. 2017. *data.table: Extension of `data.frame`*.
- 254 Duncan Temple Lang and the CRAN team. 2018. *RCurl: General Network (HTTP/FTP/...)*  
255 *Client Interface for R*.
- 256 Garnier S. 2018. *viridis: default color maps from “matplotlib.”*
- 257 Gomi T, Adachi K, Shimizu A, Tanimoto K, Kawabata E, Takeda M. 2009. Northerly shift in  
258 voltinism watershed in *Hyphantria cunea* (Drury) (Lepidoptera: Arctiidae) along the  
259 Japan Sea coast: Evidence of global warming? *Applied Entomology and Zoology*  
260 44:357–362. DOI: 10.1303/aez.2009.357.

- 261 Gomi T, Takeda M. 1996. Changes in life-history traits in the fall webworm within half a  
262 century of introduction to Japan. *Functional Ecology* 10:384–389. DOI:  
263 10.2307/2390287.
- 264 Halkett F, Harrington R, Hullé M, Kindlmann P, Menu F, Rispe C, Plantegenest M. 2004.  
265 Dynamics of production of sexual forms in aphids: theoretical and experimental  
266 evidence for adaptive “coin-flipping” plasticity. *The American Naturalist* 163:E112–  
267 E125. DOI: 10.1086/383618.
- 268 Hijmans RJ. 2017. *geosphere: spherical trigonometry*.
- 269 Hou Y-Y, Xu L-Z, Wu Y, Wang P, Shi J-J, Zhai B-P. 2016. Geographic variation of diapause and  
270 sensitive stages of photoperiodic response in *Laodelphax striatellus* Fallén  
271 (Hemiptera: Delphacidae). *Journal of Insect Science* 16. DOI: 10.1093/jisesa/iev161.
- 272 Ichijo N. 1986. Disjunctive cline of critical photoperiod in the reproductive diapause of  
273 *Drosophila lacertosa*. *Evolution* 40:418–421. DOI: 10.2307/2408820.
- 274 Ito K, Nakata T. 2000. Geographical variation of photoperiodic response in the females of a  
275 predatory bug, *Orius sauteri* (Poppius) (Heteroptera: Anthocoridae) from northern  
276 Japan. *Applied Entomology and Zoology* 35:101–105. DOI: 10.1303/aez.2000.101.
- 277 Jordan RG, Bradshaw WE. 1978. Geographic Variation in the Photoperiodic Response of the  
278 Western Tree-Hole Mosquito, *Aedes sierrensis*. *Annals of the Entomological Society*  
279 *of America* 71:487–490. DOI: 10.1093/aesa/71.4.487.
- 280 Kato Y. 2005. Geographic variation in photoperiodic response for the induction of pupal  
281 diapause in the Aristolochia-feeding butterfly *Atrophaneura alcinous*. *Applied*  
282 *Entomology and Zoology* 40:347–350. DOI: 10.1303/aez.2005.347.

- 283 Kimura MT. 1984. Geographic variation of reproductive diapause in the *Drosophila auraria*  
284 complex (Diptera: Drosophilidae). *Physiological Entomology* 9:425–431. DOI:  
285 10.1111/j.1365-3032.1984.tb00784.x.
- 286 Kimura MT. 1988. Adaptations to temperate climates and evolution of overwintering  
287 strategies in the *Drosophila melanogaster* species group. *Evolution* 42:1288–1297.  
288 DOI: 10.2307/2409012.
- 289 Kimura MT, Bessho A, Dai Z-H. 1993. The influence of gene flow on latitudinal clines of  
290 photoperiodic adult diapause in the *Drosophila auraria* species-complex. *Biological*  
291 *Journal of the Linnean Society* 48:335–341. DOI: 10.1016/0024-4066(93)90004-8.
- 292 Kimura MT, Ohtsu T, Yoshida T, Awasaki T, Lin F-J. 1994. Climatic adaptations and  
293 distributions in the *Drosophila takahashii* species subgroup (Diptera: Drosophilidae).  
294 *Journal of Natural History* 28:401–409. DOI: 10.1080/00222939400770181.
- 295 Koveos DS, Kroon A, Veerman A. 1993. The same photoperiodic clock may control induction  
296 and maintenance of diapause in the spider mite *Tetranychus urticae*. *Journal of*  
297 *Biological Rhythms* 8:265–282. DOI: 10.1177/074873049300800401.
- 298 Kurahashi H, Ohtaki T. 1989. Geographic variation in the incidence of pupal diapause in  
299 Asian and Oceanian species of the flesh fly *Boettcherisca* (Diptera: Sarcophagidae).  
300 *Physiological Entomology* 14:291–298. DOI: 10.1111/j.1365-3032.1989.tb01096.x.
- 301 Kurota H, Shimada M. 2003a. Photoperiod-dependent adult diapause within a geographical  
302 cline in the multivoltine bruchid *Bruchidius dorsalis*. *Entomologia Experimentalis et*  
303 *Applicata* 106:177–185. DOI: 10.1046/j.1570-7458.2003.00023.x.
- 304 Kurota H, Shimada M. 2003b. Geographical variation in photoperiodic induction of larval  
305 diapause in the bruchid beetle, *Bruchidius dorsalis*: polymorphism in overwintering



- 306 stages. *Entomologia Experimentalis et Applicata* 107:11–18. DOI: 10.1046/j.1570-  
307 7458.2003.00033.x.
- 308 Lankinen P. 1986. Geographical variation in circadian eclosion rhythm and photoperiodic  
309 adult diapause in *Drosophila littoralis*. *Journal of Comparative Physiology A* 159:123–  
310 142. DOI: 10.1007/BF00612503.
- 311 Lehmann P, Lytinen A, Piironen S, Lindström L. 2015. Latitudinal differences in diapause  
312 related photoperiodic responses of European Colorado potato beetles (*Leptinotarsa*  
313 *decemlineata*). *Evolutionary Ecology* 29:269–282. DOI: 10.1007/s10682-015-9755-x.
- 314 Lumme J, Oikarinen A. 1977. The genetic basis of the geographically variable photoperiodic  
315 diapause in *Drosophila littoralis*. *Hereditas* 86:129–141. DOI: 10.1111/j.1601-  
316 5223.1977.tb01221.x.
- 317 Lushai G, Harrington R. 1996. Inheritance of photoperiodic response in the bird cherry  
318 aphid, *Rhopalosiphum padi*. *Physiological Entomology* 21:297–303. DOI:  
319 10.1111/j.1365-3032.1996.tb00868.x.
- 320 Menne M, Durre I, Korzeniewski B, McNeal S, Thomas K, Yin X, Anthony S, Ray R, Vose RS,  
321 Gleason BE, Houston TG. 2012a. Global Historical Climatology Network - Daily  
322 (GHCN-Daily), Version 3. 22.
- 323 Menne MJ, Durre I, Vose RS, Gleason BE, Houston TG. 2012b. An Overview of the Global  
324 Historical Climatology Network-Daily Database. *Journal of Atmospheric and Oceanic*  
325 *Technology* 29:897–910. DOI: 10.1175/JTECH-D-11-00103.1.
- 326 Murata Y, Ideo S, Watada M, Mitsui H, Kimura MT. 2013. Genetic and physiological variation  
327 among sexual and parthenogenetic populations of *Asobara japonica* (Hymenoptera:  
328 Braconidae), a larval parasitoid of drosophilid flies. *European Journal of Entomology*  
329 106:171–178. DOI: 10.14411/eje.2009.020.

- 330 Musolin DL, Tougou D, Fujisaki K. 2011. Photoperiodic response in the subtropical and  
331 warm-temperate zone populations of the southern green stink bug *Nezara viridula*:  
332 why does it not fit the common latitudinal trend? *Physiological Entomology* 36:379–  
333 384. DOI: 10.1111/j.1365-3032.2011.00797.x.
- 334 Nakao S. 2011. Geographical variation of photoperiodic wing form determination and  
335 genetic background of reproductive diapause in arrhenotokous populations of *Thrips*  
336 *nigropilosus* Uzel (Thysanoptera: Thripidae) in Japan. *Applied Entomology and*  
337 *Zoology* 46:111–116. DOI: 10.1007/s13355-010-0016-8.
- 338 Nechols JR, Tauber MJ, Tauber CA. 1987. Geographical variability in ecophysiological traits  
339 controlling dormancy in *Chrysopa oculata* (Neuroptera: Chrysopidae). *Journal of*  
340 *Insect Physiology* 33:627–633. DOI: 10.1016/0022-1910(87)90131-4.
- 341 Noda H. 1992. Geographic variation of nymphal diapause in the small brown planthopper in  
342 Japan. *Japan Agricultural Research Quarterly* 26:124–129.
- 343 Paolucci S, Zande L van de, Beukeboom LW. 2013. Adaptive latitudinal cline of  
344 photoperiodic diapause induction in the parasitoid *Nasonia vitripennis* in Europe.  
345 *Journal of Evolutionary Biology* 26:705–718. DOI: 10.1111/jeb.12113.
- 346 Pegoraro M, Zonato V, Tyler ER, Fedele G, Kyriacou CP, Tauber E. 2017. Geographical  
347 analysis of diapause inducibility in European *Drosophila melanogaster* populations.  
348 *Journal of Insect Physiology* 98:238–244. DOI: 10.1016/j.jinsphys.2017.01.015.
- 349 Plummer M. 2018. *rjags: Bayesian Graphical Models using MCMC*.
- 350 Pullin AS. 1986. Effect of photoperiod and temperature on the life-cycle of different  
351 populations of the peacock butterfly *Inachis io*. *Entomologia Experimentalis et*  
352 *Applicata* 41:237–242. DOI: 10.1111/j.1570-7458.1986.tb00534.x.

- 353 Qureshi M-H, Murai T, Yoshida H, Tsumuki H. 2000. Populational variation in diapause-  
354 induction and -termination of *Helicoverpa armigera* (Lepidoptera: Noctuidae).  
355 *Applied Entomology and Zoology* 35:357–360. DOI: 10.1303/aez.2000.357.
- 356 R Core Team. *R: A language and environment for statistical computing*.
- 357 Raudenbush SW. 2009. Analyzing effect sizes: Random effects models. In: *The handbook of*  
358 *research synthesis and meta-analysis*. New York, USA: Russell Sage Foundation, 295–  
359 315.
- 360 Reznik SY, Dolgovskaya MY, Ovchinnikov AN, Belyakova NA. 2015. Weak photoperiodic  
361 response facilitates the biological invasion of the harlequin ladybird *Harmonia*  
362 *axyridis* (Pallas) (Coleoptera: Coccinellidae). *Journal of Applied Entomology* 139:241–  
363 249. DOI: 10.1111/jen.12158.
- 364 Riihimaa A, Kimura MT, Lumme J, Lakovaara S. 1996. Geographical variation in the larval  
365 diapause of *Chymomyza costata* (Diptera; Drosophilidae). *Hereditas* 124:151–164.  
366 DOI: 10.1111/j.1601-5223.1996.00151.x.
- 367 Rinker TW. 2017. *textreadr: Read Text Documents into R*. Buffalo, New York, USA.
- 368 Rohatgi A. 2017. *WebPlotDigitizer*. Austin, Texas, USA.
- 369 Ryan SF, Valella P, Thivierge G, Aardema ML, Scriber JM. 2018. The role of latitudinal,  
370 genetic and temperature variation in the induction of diapause of *Papilio glaucus*  
371 (Lepidoptera: Papilionidae). *Insect Science* 25:328–336. DOI: 10.1111/1744-  
372 7917.12423.
- 373 Sadakiyo S, Ishihara M. 2011. Rapid seasonal adaptation of an alien bruchid after  
374 introduction: geographic variation in life cycle synchronization and critical  
375 photoperiod for diapause induction. *Entomologia Experimentalis et Applicata*  
376 140:69–76. DOI: 10.1111/j.1570-7458.2011.01136.x.

- 377 Schroeder M, Dalin P. 2017. Differences in photoperiod-induced diapause plasticity among  
378 different populations of the bark beetle *Ips typographus* and its predator  
379 *Thanasimus formicarius*. *Agricultural and Forest Entomology* 19:146–153. DOI:  
380 10.1111/afe.12189.
- 381 Shimizu K, Fujisaki K. 2002. Sexual differences in diapause induction of the cotton bollworm,  
382 *Helicoverpa armigera* (Hb.) (Lepidoptera: Noctuidae). *Applied Entomology and*  
383 *Zoology* 37:527–533. DOI: 10.1303/aez.2002.527.
- 384 Shimizu K, Fujisaki K. 2006. Geographic variation in diapause induction under constant and  
385 changing conditions in *Helicoverpa armigera*. *Entomologia Experimentalis et*  
386 *Applicata* 121:253–260. DOI: 10.1111/j.1570-8703.2006.00483.x.
- 387 Shimizu T, Kawasaki K. 2001. Geographic variability in diapause response of Japanese Orius  
388 species. *Entomologia Experimentalis et Applicata* 98:303–316. DOI: 10.1046/j.1570-  
389 7458.2001.00787.x.
- 390 Shintani Y, Ishikawa Y. 1999. Transition of diapause attributes in the hybrid zone of the two  
391 morphological types of *Psacotha hilaris* (Coleoptera: Cerambycidae). *Environmental*  
392 *Entomology* 28:690–695. DOI: 10.1093/ee/28.4.690.
- 393 Shintani Y, Tatsuki S, Ishikawa Y. 1996. Geographic variation of photoperiodic response in  
394 larval development of the yellow-spotted longicorn beetle, *Psacotha hilaris*  
395 (*pascoe*) (Coleoptera: Cerambycidae). *Applied Entomology and Zoology* 31:495–504.  
396 DOI: 10.1303/aez.31.495.
- 397 Shroyer DA, Craig GB. 1983. Egg diapause in *Aedes triseriatus* (Diptera: Culicidae):  
398 geographic variation in photoperiodic response and factors influencing diapause  
399 termination. *Journal of Medical Entomology* 20:601–607. DOI:  
400 10.1093/jmedent/20.6.601.

- 401 So P-M, Takafuji A. 1992. Local variation in diapause characteristics of *Tetranychus urticae*  
402 Koch (Acarina: Tetranychidae). *Oecologia* 90:270–275. DOI: 10.1007/BF00317185.
- 403 Suwa A, Gotoh T. 2006. Geographic variation in diapause induction and mode of diapause  
404 inheritance in *Tetranychus pueraricola*. *Journal of Applied Entomology* 130:329–335.  
405 DOI: 10.1111/j.1439-0418.2006.01050.x.
- 406 Takeda M, Chippendale GM. 1982. Phenological adaptations of a colonizing insect: The  
407 southwestern corn borer, *Diatraea grandiosella*. *Oecologia* 53:386–393. DOI:  
408 10.1007/BF00389019.
- 409 Tyukmaeva VI, Salminen TS, Kankare M, Knott KE, Hoikkala A. 2011. Adaptation to a  
410 seasonally varying environment: a strong latitudinal cline in reproductive diapause  
411 combined with high gene flow in *Drosophila montana*. *Ecology and Evolution* 1:160–  
412 168. DOI: 10.1002/ece3.14.
- 413 Urbanski J, Mogi M, O’Donnell D, DeCotiis M, Toma T, Armbruster P. 2012. Rapid adaptive  
414 evolution of photoperiodic response during invasion and range expansion across a  
415 climatic gradient. *The American Naturalist* 179:490–500. DOI: 10.1086/664709.
- 416 Vaz Nunes M, Koveos DS, Veerman A. 1990. Geographical variation in photoperiodic  
417 induction of diapause in the spider mite (*Tetranychus urticae*): a causal relation  
418 between critical nightlength and circadian period? *Journal of Biological Rhythms*  
419 5:47–57. DOI: 10.1177/074873049000500105.
- 420 Viechtbauer W. 2010. Conducting meta-analyses in R with the metafor package. *Journal of*  
421 *Statistical Software* 36:1–48.
- 422 Waldock J, Chandra NL, Lelieveld J, Proestos Y, Michael E, Christophides G, Parham PE. 2013.  
423 The role of environmental variables on *Aedes albopictus* biology and chikungunya

- 424 epidemiology. *Pathogens and Global Health* 107:224–241. DOI:  
425 10.1179/2047773213Y.0000000100.
- 426 Wang X-P, Yang Q-S, Dalin P, Zhou X-M, Luo Z-W, Lei C-L. 2012. Geographic variation in  
427 photoperiodic diapause induction and diapause intensity in *Sericanus montelus*  
428 (Lepidoptera: Papilionidae). *Insect Science* 19:295–302. DOI: 10.1111/j.1744-  
429 7917.2011.01473.x.
- 430 Wickahm H. 2017. *tidyverse: Easily Install and Load the “Tidyverse”*.
- 431 Wipking W. 1988. Repeated larval diapause and diapause-free development in geographic  
432 strains of the burnet moth *Zygaena trifolii* Esp. (Insecta, Lepidoptera). *Oecologia*  
433 77:557–564. DOI: 10.1007/BF00377274.
- 434 Yoshida T, Kimura TM. 1994. Relation of the circadian system to the photoperiodic clock in  
435 *Drosophila triauraria* (Diptera: Drosophilidae) : an approach from analysis of  
436 geographic variation. *Applied Entomology and Zoology* 29:499–505. DOI:  
437 10.1303/aez.29.499.
- 438 Yoshio M, Ishii M. 1998. Geographical variation of pupal diapause in the great mormon  
439 butterfly, *Papilio memnon* L. (Lepidoptera : Papilionidae), in Western Japan. *Applied*  
440 *Entomology and Zoology* 33:281–288. DOI: 10.1303/aez.33.281.
- 441 健一橋本, 和子飯島, 賢一小川. 2008. モンシロチョウ *Pieris rapae crucivora* Boisduval (   
442 チョウ目 : シロチョウ科) の蛹休眠を誘起する光周反応の地理的変異. 日本応  
443 用動物昆虫学会誌 52:201–206. DOI: 10.1303/jjaez.2008.201.
- 444 哲雄後藤, 徳純真梶. 1981. 日本産ナミハダニ *Tetranychus urticae* KOCH の休眠誘起の臨  
445 界日長とその地理的変異. 日本応用動物昆虫学会誌 25:113–118. DOI:  
446 10.1303/jjaez.25.113.

- 447 幸雄桑名. 1986. ブチヒゲヤナギドクガの光周反応と地理的起源. 日本応用動物昆虫学  
448 会誌 30:173–178. DOI: 10.1303/jjaez.30.173.
- 449 武氏家. 1985. キンモンホソガの休眠に関する研究. 日本応用動物昆虫学会誌 29:198–  
450 202. DOI: 10.1303/jjaez.29.198.
- 451 顕次藤本, 民人櫻井, 史郎中尾. 2014. アカメガシワクダアザミウマ雌成虫における休  
452 眠性の地理的変異. 日本応用動物昆虫学会誌 58:47–54. DOI:  
453 10.1303/jjaez.2014.47.
- 454
